# Supplementary material for: Boosting the photoelectrochemical performance of ZnIn 2 S 4 photoanodes via antimony-induced defect and surface homojunction engineering
Source: Royal Society of Chemistry journal article supplement (doi:10.1039/d5ta09927g), 2026-01-01
Supplement: d5ta09927g1.pdf [file d5ta09927g1.pdf]

## Electronic Supplementary Information (ESI)

### **Boosting photoelectrochemical performance of ZnIn<sub>2</sub>S<sub>4</sub> photoanodes via antimony-induced defect and surface homojunction engineering**

Yequan Xiao,<sup>‡a</sup> Niu Wang,<sup>‡a</sup> Ziyi Zhang,<sup>a</sup> Yujie Zou,<sup>a</sup> Bowen Li,<sup>b</sup> Zeyu Fan,<sup>d</sup> Ronghua Li,<sup>d</sup> Yulong Qiao,<sup>b</sup> Ting Xiao,<sup>a</sup> Lihua Jiang,<sup>a</sup> Haijiao Xie,<sup>f</sup> Jingfu He,<sup>c</sup> Xiaobo Chen,<sup>a</sup> Yanbo Li,<sup>d</sup> Changli Li,<sup>\*c</sup> Xinyu Tan<sup>\*a, e</sup>

<sup>a</sup> *Hubei Provincial Engineering Research Center for Solar Energy High-value Utilization and Green Conversion, College of Materials Science and Engineering, China Three Gorges University Yichang, Hubei 443002, P. R. China.*

<sup>b</sup> *College of Electrical Engineering & New Energy, China Three Gorges University Yichang, Hubei 443002, P. R. China.*

<sup>c</sup> *School of Materials, Sun Yat-sen University, Shenzhen 518107, P. R. China*

<sup>d</sup> *Institute of Fundamental and Frontier Sciences, University of Electronic Science and Technology of China, Chengdu, 610054, P. R. China.*

<sup>e</sup> *School of New Energy, Jingchu University of Technology, Jingmen, Hubei, 448000, PR China*

<sup>f</sup> *Hangzhou Yanqu Information Technology Co., Ltd., Hangzhou, Zhejiang 310003, P. R. China.*

<sup>‡</sup> These authors contributed equally to this work.

\* Email: [lichli5@mail.sysu.edu.cn](mailto:lichli5@mail.sysu.edu.cn) (C. Li); [tanxin@ctgu.edu.cn](mailto:tanxin@ctgu.edu.cn) (X. Tan).

## Contents

|                                                                                                                                                                                                                                                                                                                                                    |    |
|----------------------------------------------------------------------------------------------------------------------------------------------------------------------------------------------------------------------------------------------------------------------------------------------------------------------------------------------------|----|
| <b>Experimental Section</b> .....                                                                                                                                                                                                                                                                                                                  | 1  |
| <b>Fig. S1.</b> Photographic image of fabricated photoanode.....                                                                                                                                                                                                                                                                                   | 8  |
| <b>Fig. S2.</b> Top-view SEM images for as-prepared $\text{ZnIn}_2\text{S}_4$ (a), $\text{O-ZnIn}_2\text{S}_4$ (b), and $\text{Sb:O-ZnIn}_2\text{S}_4$ (c) nanosheet films .....                                                                                                                                                                   | 9  |
| <b>Fig. S3.</b> SEM-EDS elemental mappings of as-prepared $\text{ZnIn}_2\text{S}_4$ (a) and $\text{O-ZnIn}_2\text{S}_4$ (b) samples.....                                                                                                                                                                                                           | 9  |
| <b>Fig. S4.</b> (a-c) SEM-EDS elemental mappings analysis of as-prepared $\text{ZnIn}_2\text{S}_4$ (a), $\text{O-ZnIn}_2\text{S}_4$ (b), and $\text{Sb:O-ZnIn}_2\text{S}_4$ (c) samples. (d) The corresponding atomic ratios of the three samples were obtained through EDS mapping analysis. ....                                                 | 10 |
| <b>Fig. S5.</b> STM-EDS line scan of elements (Zn, In, Sb, S, O) in the $\text{Sb:O-ZnIn}_2\text{S}_4$ sample. ....                                                                                                                                                                                                                                | 10 |
| <b>Fig. S6.</b> Normalized Raman spectra of as-prepared $\text{ZnIn}_2\text{S}_4$ , $\text{O-ZnIn}_2\text{S}_4$ , and $\text{Sb:O-ZnIn}_2\text{S}_4$ samples. ....                                                                                                                                                                                 | 11 |
| <b>Fig. S7.</b> XPS survey spectra of as-prepared $\text{ZnIn}_2\text{S}_4$ , $\text{O-ZnIn}_2\text{S}_4$ , and $\text{Sb:O-ZnIn}_2\text{S}_4$ samples.....                                                                                                                                                                                        | 12 |
| <b>Fig. S8.</b> XPS core-level spectra of C 1s (a), Zn 2p (b), and In 3d (c) for as-prepared $\text{ZnIn}_2\text{S}_4$ , $\text{O-ZnIn}_2\text{S}_4$ , and $\text{Sb:O-ZnIn}_2\text{S}_4$ samples. ....                                                                                                                                            | 12 |
| <b>Fig. S9.</b> Temperature-dependent HAXPES analysis of $\text{O-ZnIn}_2\text{S}_4$ (a) and $\text{Sb:O-ZnIn}_2\text{S}_4$ (b) after air annealing under identical conditions .....                                                                                                                                                               | 13 |
| <b>Fig. S10.</b> (a) Room temperature PL spectra for as-prepared $\text{ZnIn}_2\text{S}_4$ , $\text{O-ZnIn}_2\text{S}_4$ , and $\text{Sb:O-ZnIn}_2\text{S}_4$ samples measured under 420 nm laser excitation. (b) Schematic illustration of the mechanisms involved in the PL emission related to defects in $\text{ZnIn}_2\text{S}_4$ .....       | 14 |
| <b>Fig. S11.</b> TRPL decay curves of $\text{Sb:O-ZnIn}_2\text{S}_4$ samples with different $\text{SbCl}_3$ concentrations, recorded at about 690 nm under 420 nm laser excitation.....                                                                                                                                                            | 15 |
| <b>Fig. S12.</b> (a) Constructed monolayer $\text{ZnIn}_2\text{S}_4$ supercell. (b) $\text{ZnIn}_2\text{S}_4$ supercell containing In vacancies (termed as $\text{ZnIn}_{2-x}\text{S}_4$ ). (c) $\text{ZnIn}_2\text{S}_4$ supercell (termed as $\text{Sb-ZnIn}_{2-x}\text{S}_4$ ) with partial substitution of In vacancies or In atoms by Sb..... | 16 |

- Fig. S13.** (a) Simulated O-substituted  $\text{ZnIn}_{2-x}\text{S}_4$  structures with one O atom replacing different equivalent S sites (denoted as  $1\text{O-ZnIn}_{2-x}\text{S}_{4-y}$ ) and their corresponding formation energies ( $E_{\text{form}}$ ). (b) Simulated Sb- and O-cosubstituted  $\text{ZnIn}_{2-x}\text{S}_4$  structures with one O atom replacing different equivalent S sites (termed as  $\text{Sb:}1\text{O-ZnIn}_{2-x}\text{S}_{4-y}$ ) and their corresponding  $E_{\text{form}}$ . ..... 17
- Fig. S14.** (a) Simulated  $2\text{O-ZnIn}_{2-x}\text{S}_{4-y}$  structures and their corresponding  $E_{\text{form}}$ . (b) Simulated  $\text{Sb:}2\text{O-ZnIn}_{2-x}\text{S}_{4-y}$  structures and their corresponding  $E_{\text{form}}$ . ..... 18
- Fig. S15.** (a) Simulated  $3\text{O-ZnIn}_{2-x}\text{S}_{4-y}$  structures with three O substituting different equivalent S sites and their corresponding  $E_{\text{form}}$ . (b) Simulated  $\text{Sb:}3\text{O-ZnIn}_{2-x}\text{S}_{4-y}$  structures and their corresponding  $E_{\text{form}}$ . (c) Simulated  $\text{Sb:}4\text{O-ZnIn}_{2-x}\text{S}_{4-y}$  structures with four O atoms substituting different equivalent S sites and their corresponding  $E_{\text{form}}$ . ..... 19
- Fig. S16.** Relationship between  $E_{\text{form}}$  and the number of O substitutions for the most stable structures in the  $\text{O-ZnIn}_2\text{S}_4$  and  $\text{Sb:O-ZnIn}_2\text{S}_4$  systems. .... 20
- Fig. S17.** Tauc plots of UV-vis absorption spectra for as-prepared  $\text{ZnIn}_2\text{S}_4$ ,  $\text{O-ZnIn}_2\text{S}_4$ , and  $\text{Sb:O-ZnIn}_2\text{S}_4$  samples. .... 21
- Fig. S18.** (a) First-order differential of the UPS spectra for as-prepared  $\text{ZnIn}_2\text{S}_4$ ,  $\text{O-ZnIn}_2\text{S}_4$ , and  $\text{Sb:O-ZnIn}_2\text{S}_4$  samples. (b) UPS spectra from the low Sb concentration region in  $\text{Sb:O-ZnIn}_2\text{S}_4$  sample (denoted as  $\text{Sb:O-ZnIn}_2\text{S}_4$  (inside)), obtained by spin-coating with a 1 mM  $\text{SbCl}_3$  solution. (c) Valence band spectra of  $\text{Sb:O-ZnIn}_2\text{S}_4$  (inside) in the low binding energy region of the UPS spectra, used to determine the valence band position. .... 22
- Fig. S19.** XPS depth profile of the core-level spectra for Zn 2p (a), In 3d (b), S 2p (c), and (O 1s + Sb 3d) (d) in the  $\text{Sb:O-ZnIn}_2\text{S}_4$  sample. .... 23
- Fig. S20.** Fitted core-level spectra of Zn 2p (a), In 3d (b), S 2p (c), and (O 1s + Sb 3d<sub>5/2</sub>) (d) for the  $\text{Sb:O-ZnIn}_2\text{S}_4$  sample at different XPS depth etching times. .... 24
- Fig. S21.** (a) *J-V* curves of as-prepared  $\text{ZnIn}_2\text{S}_4$  (sample #3 in panel b),  $\text{O-ZnIn}_2\text{S}_4$  (sample #2 in panel c), and  $\text{Sb:O-ZnIn}_2\text{S}_4$  (sample #3 in panel d) photoanodes measured in 0.5M  $\text{Na}_2\text{SO}_4$  (pH 6.8) under chopped AM1.5G simulated sunlight ( $100 \text{ mW cm}^{-2}$ ) with a scan rate of  $10 \text{ mV s}^{-1}$ . (b-d) Reproducibility of the chopped

|                                                                                                                                                                                                                                                                                                                                                                                                                                                           |    |
|-----------------------------------------------------------------------------------------------------------------------------------------------------------------------------------------------------------------------------------------------------------------------------------------------------------------------------------------------------------------------------------------------------------------------------------------------------------|----|
| <i>J-V</i> curves measured for five independently prepared electrodes for each sample type, including (b) as-prepared ZnIn <sub>2</sub> S <sub>4</sub> , (c) O-ZnIn <sub>2</sub> S <sub>4</sub> , and (d) Sb:O-ZnIn <sub>2</sub> S <sub>4</sub> photoanodes. ....                                                                                                                                                                                         | 25 |
| <b>Fig. S22.</b> <i>J-V</i> curves for Sb:O-ZnIn <sub>2</sub> S <sub>4</sub> photoanodes with different Sb incorporation concentrations, measured in 0.5M Na <sub>2</sub> SO <sub>4</sub> (pH 6.8) under continuous AM1.5G simulated sunlight (100 mW cm <sup>-2</sup> ) with a scan rate of 10 mV s <sup>-1</sup> . ....                                                                                                                                 | 26 |
| <b>Fig. S23.</b> Annealing temperature and time dependence of the PEC performance of O-ZnIn <sub>2</sub> S <sub>4</sub> and Sb:O-ZnIn <sub>2</sub> S <sub>4</sub> photoanodes measured in 0.5 M Na <sub>2</sub> SO <sub>4</sub> (pH 6.8) under AM 1.5G illumination (100 mW cm <sup>-2</sup> ). (a, b) <i>J-V</i> curves of photoanodes annealed at different temperatures. (c, d) <i>J-V</i> curves of photoanodes annealed for different durations..... | 27 |
| <b>Fig. S26.</b> Extended PEC stability tests of as-prepared ZnIn <sub>2</sub> S <sub>4</sub> , O-ZnIn <sub>2</sub> S <sub>4</sub> , and Sb:O-ZnIn <sub>2</sub> S <sub>4</sub> photoanodes measured in 0.5 M Na <sub>2</sub> SO <sub>4</sub> electrolyte at 1.0 V vs. RHE. <i>J-T</i> curves were recorded under chopped (a) and continuous (b) AM 1.5G illumination for 60 min .....                                                                     | 30 |
| <b>Fig. S27.</b> Top-view SEM images for as-prepared ZnIn <sub>2</sub> S <sub>4</sub> (a, d), O-ZnIn <sub>2</sub> S <sub>4</sub> (b, e), and Sb:O-ZnIn <sub>2</sub> S <sub>4</sub> (c, f) samples before (a-c) and after (d-f) a 10 min PEC test.....                                                                                                                                                                                                     | 31 |
| <b>Fig. S29.</b> Solar photocurrent spectra and integrated photocurrent curves for O-ZnIn <sub>2</sub> S <sub>4</sub> and Sb:O-ZnIn <sub>2</sub> S <sub>4</sub> photoanodes. ....                                                                                                                                                                                                                                                                         | 33 |
| <b>Fig. S30.</b> Mott-Schottky plots of as-prepared ZnIn <sub>2</sub> S <sub>4</sub> (a), O-ZnIn <sub>2</sub> S <sub>4</sub> (b), and Sb:O-ZnIn <sub>2</sub> S <sub>4</sub> (c) photoanodes, measured for three independently prepared samples in 0.5 M Na <sub>2</sub> SO <sub>4</sub> electrolyte under dark conditions.....                                                                                                                            | 34 |
| <b>Fig. S31.</b> Mott-Schottky plots of Sb:O-ZnIn <sub>2</sub> S <sub>4</sub> with varying Sb incorporation concentrations.. ....                                                                                                                                                                                                                                                                                                                         | 35 |
| <b>Fig. S32.</b> PEIS for as-prepared ZnIn <sub>2</sub> S <sub>4</sub> , O-ZnIn <sub>2</sub> S <sub>4</sub> , and Sb:O-ZnIn <sub>2</sub> S <sub>4</sub> photoanodes, measured for three independently prepared samples in 0.5M Na <sub>2</sub> SO <sub>4</sub> electrolyte under AM 1.5G simulated sunlight.....                                                                                                                                          | 36 |
| <b>Fig. S33.</b> PEIS for Sb:O-ZnIn <sub>2</sub> S <sub>4</sub> photoanodes with varying Sb incorporation concentrations measured in 0.5M Na <sub>2</sub> SO <sub>4</sub> electrolyte under AM 1.5G simulated sunlight.....                                                                                                                                                                                                                               | 37 |

|                                                                                                                                                                                                                                                                                                                                                                                                                                                     |    |
|-----------------------------------------------------------------------------------------------------------------------------------------------------------------------------------------------------------------------------------------------------------------------------------------------------------------------------------------------------------------------------------------------------------------------------------------------------|----|
| <b>Fig. S34.</b> Absorbed solar photocurrent spectra and absorption photocurrent ( $J_{\text{abs}}$ ) curves for O-ZnIn <sub>2</sub> S <sub>4</sub> and Sb:O-ZnIn <sub>2</sub> S <sub>4</sub> photoanodes.....                                                                                                                                                                                                                                      | 38 |
| <b>Fig. S35.</b> Open circuit potential (OCP) decay profiles for as-prepared ZnIn <sub>2</sub> S <sub>4</sub> , O-ZnIn <sub>2</sub> S <sub>4</sub> , and Sb:O-ZnIn <sub>2</sub> S <sub>4</sub> photoanodes under illumination and in the dark. ....                                                                                                                                                                                                 | 39 |
| <b>Fig. S36.</b> (a-c) Cyclic voltammograms of as-prepared ZnIn <sub>2</sub> S <sub>4</sub> (a), O-ZnIn <sub>2</sub> S <sub>4</sub> (b), and Sb:O-ZnIn <sub>2</sub> S <sub>4</sub> (c) photoanodes recorded in 0.5 M Na <sub>2</sub> SO <sub>4</sub> solution at various scan rates. (d) Difference between the cathodic and anodic charging current densities at 0.10 V vs. RHE plotted as a function of scan rate for the three photoanodes ..... | 40 |
| <b>Fig. S37.</b> (a) Dark $J$ - $V$ curves of as-prepared ZnIn <sub>2</sub> S <sub>4</sub> , O-ZnIn <sub>2</sub> S <sub>4</sub> , and Sb:O-ZnIn <sub>2</sub> S <sub>4</sub> photoanodes measured in 0.5M Na <sub>2</sub> SO <sub>4</sub> with a scan rate of 10 mV s <sup>-1</sup> . (b) Corresponding Tafel plots.....                                                                                                                             | 41 |
| <b>Table S1.</b> Detailed HAXPES and XPS data analyzed using Thermo Fisher Scientific's Advantage software.. .....                                                                                                                                                                                                                                                                                                                                  | 42 |
| <b>Table S2.</b> Quantitative elemental compositions of the samples obtained from HAXPES and XPS data analysis.....                                                                                                                                                                                                                                                                                                                                 | 43 |
| <b>Table S3.</b> Fitted parameters for the TRPL decay of different Sb:O-ZnIn <sub>2</sub> S <sub>4</sub> samples.. .....                                                                                                                                                                                                                                                                                                                            | 44 |
| <b>Table S5.</b> Total energies, corresponding formation energies ( $E_{\text{form}}$ ) and atomic ratios of the DFT-optimized structural models .....                                                                                                                                                                                                                                                                                              | 45 |
| <b>Table S6.</b> Bandgap and band positions of different ZnIn <sub>2</sub> S <sub>4</sub> samples determined by UPS spectra and UV-vis absorption spectra. ....                                                                                                                                                                                                                                                                                     | 48 |
| <b>Table S7.</b> PEC water oxidation performances of recently reported ZnIn <sub>2</sub> S <sub>4</sub> -based photoanodes (2014-2025). ....                                                                                                                                                                                                                                                                                                        | 49 |
| <b>Table S8.</b> Fitted values of CPE parameters obtained from EIS measurements. ....                                                                                                                                                                                                                                                                                                                                                               | 51 |

## Experimental Section

### 1.1. Preparation of materials

ZnIn<sub>2</sub>S<sub>4</sub> nanosheets were synthesized on FTO conductive glasses substrates via a facile hydrothermal method. Briefly, FTO glass (50×10 mm<sup>2</sup>, ≤14 Ω sq<sup>-1</sup>) was sequentially ultrasonically cleaned in acetone, isopropanol, and deionized (DI) water for 15 min each. The cleaned substrates were then placed into a 100 mL Teflon-lined stainless-steel autoclave, tilted against the wall with the conductive side facing downward. The Teflon liner contained a precursor solution prepared by dissolving 0.0068 g of zinc chloride (ZnCl<sub>2</sub>, Aladdin, 99.95%), 0.22 g of indium chloride tetrahydrate (InCl<sub>3</sub>·4H<sub>2</sub>O, Aladdin, 99.9%), and 0.30 g of thiourea (CH<sub>4</sub>N<sub>2</sub>S, Aladdin, 99%) in 50 mL of DI water under constant stirring for 10 min at room temperature. The sealed autoclave was heated at 170 °C for 12 h and naturally cooled to room temperature. The obtained ZnIn<sub>2</sub>S<sub>4</sub> films on FTO substrate were rinsed with DI water and air-dried at room temperature, denoted as as-prepared ZnIn<sub>2</sub>S<sub>4</sub>.

To obtain oxygen-substituted ZnIn<sub>2</sub>S<sub>4</sub> (O-ZnIn<sub>2</sub>S<sub>4</sub>), the as-prepared samples were annealed in air at 400 °C for 1 h with a heating rate of 5 °C min<sup>-1</sup>. For Sb modification, antimony trichloride (SbCl<sub>3</sub>, Aladdin, 99%) was dissolved in 1-methoxy-2-propanol to prepare solutions with concentrations of 1, 3, 5, 8, 10, and 20 mM. Then, 30 μL of each solution was spin-coated onto an 8 × 8 mm<sup>2</sup> area of the ZnIn<sub>2</sub>S<sub>4</sub> samples using a two-step spin-coating program of 800 rpm for 10 s, followed by 3000 rpm for 60 s. The spin-coated ZnIn<sub>2</sub>S<sub>4</sub> photoanodes were subsequently annealed in air at 400 °C for 1 h, following the same procedure as O-ZnIn<sub>2</sub>S<sub>4</sub> to obtain Sb:O-ZnIn<sub>2</sub>S<sub>4</sub> samples.

## 1.2. Materials characterization

The morphology and composition of samples were characterized using a Zeiss NVision 40 field-emission SEM associated with an EDS (Oxford Ultim Max 40). The crystal structures were analyzed by XRD diffraction on Thermo Scientific ARL EQUINOX 1000 diffractometer using Cu K $\alpha$  radiation (40 kV and 30mA). Raman spectra were collected with a HORIBA JY LabRAM HR Evolution spectrometer using a 520 nm excitation wavelength. HAXPES was performed on PHI Quantes with a monochromatic Cr K $\alpha$  X-ray source (5414 eV) and a 100  $\mu$ m beam size. Room-temperature PL spectra were measured using a Picoquant FluoTime300 spectrometer, while TRPL spectra were acquired on the same instrument using 420 nm picosecond laser pulsed at a repetition rate of 40 MHz as the excitation sources. UV-vis absorbance spectra were recorded with a Shimadzu UV-3600 Plus spectrophotometer. UPS measurements were conducted using a He I (21.22 eV) excitation line, and the work function was determined from the UPS spectra by subtracting their width (that is, the energy difference between the analyses Fermi level and the high binding energy cut-off), from the He I excitation energy. XPS depth profiles were performed by etching the samples with 4 keV argon cluster ions (average cluster size of 500). Quantitative XPS analyses were carried out using Thermo Fisher Scientific Advantage Software<sup>6,9k</sup>.

## 1.3. DFT calculations

DFT calculations were performed using the Vienna Ab initio Simulation Package (VASP) with the projector augmented wave (PAW) method.<sup>1-3</sup> The Perdew-Burke-Ernzerhof (PBE) functional within the generalized gradient approximation (GGA) was

used to describe the exchange-correlation potential.<sup>4</sup> A vacuum layer of 15 Å was applied to avoid interactions between periodic images. The plane-wave cutoff energy was set to 450 eV, and a  $2 \times 2 \times 1$   $k$ -point mesh was used. Guided by XRD and SEM analyses showing a hexagonal nanosheet structure, a  $3 \times 3 \times 1$  supercell monolayer  $\text{ZnIn}_2\text{S}_4$  exposing the (002) surface (with 63 total atoms, 9 Zn atoms, 18 In atoms and 36 S atoms) was constructed. Considering the presence of In vacancies in the as-prepared  $\text{ZnIn}_2\text{S}_4$  indicated by quantitative analyses, models containing two In vacancies (established by removing the two In atom) were adopted as the initial configuration for the O-for-S substitution. Sb- and O- substituted models were generated by introducing Sb atoms into In vacancies and substituting O-for-S atoms. All structures were relaxed until the convergence tolerances of energy and force were less than  $1.0 \times 10^{-5}$  eV and  $2.0 \times 10^{-2}$  eV/Å, respectively. The DFT-D3 method was used to describe the van der Waals interaction.<sup>5</sup> The formation energy ( $E_{\text{form}}$ ) of O-for-S substituted systems was defined as:

$$E_{\text{form}} = E_{\text{substituted}} - E_{\text{unsubstituted}} - n\mu_{\text{O}} + n\mu_{\text{S}} \quad (1)$$

where  $E_{\text{substituted}}$  and  $E_{\text{unsubstituted}}$  are the total energies of O-substituted (with different  $n$  number of O atoms) and unsubstituted systems, respectively, and  $\mu_{\text{O}}$  and  $\mu_{\text{S}}$  are the chemical potential of O and S atoms, respectively.

#### 1.4. PEC characterization

PEC measurements were carried out at room temperature on an electrochemical workstation (CHI 760e, CH Instruments Inc., China) using a conventional three-electrode cell with a Pt foil counter electrode and a saturated Ag/AgCl reference



electrode. Electrical contact to the prepared photoanodes was established by soldering a copper wire to the designated region of the FTO substrate using indium, followed by encapsulation with epoxy resin (Araldite) to serve as the working electrode. The exposed electrode area after encapsulation was determined using calibrated digital images and analyzed with ImageJ<sup>1.53k</sup> software (**Fig. S1**). A commercial AM 1.5G solar simulator (LCS-100, Newport Corporation, 94011A-ES) was employed as the light source, and the irradiance was adjusted to 100 mWcm<sup>-2</sup> using a certified reference cell (Konica-Minolta AK-200). Linear sweep voltammograms (*J-V* curves) were recorded in 0.5 Na<sub>2</sub>SO<sub>4</sub> electrolyte (pH 6.8, measured using a combined pH electrode LE438 IP67 on an F2-Standard ion meter, Mettler Toledo) under an anodic scan at a rate of 10 mV s<sup>-1</sup>. All the measured potentials versus Ag/AgCl reference electrode were converted to the potentials versus RHE according to the Nernst equation:

$$E_{\text{RHE}} = E_{\text{Ag/AgCl}} + 0.0591\text{pH} + 0.1976 \quad (2)$$

The ABPE was calculated from the *J-V* curves under AM1.5G illumination using the equation:<sup>6</sup>

$$\text{ABPE} = \left[ \frac{J_{\text{photo}} (\text{mA cm}^{-2}) \times (1.23 - V_{\text{app}}) (\text{V})}{P_{\text{AM1.5G}} (\text{mW cm}^{-2})} \right] \times 100\% \quad (3)$$

where  $V_{\text{app}}$  is the applied potential versus RHE,  $J_{\text{photo}}$  is the photocurrent density measured under an applied bias, and  $P_{\text{AM1.5G}}$  is the AM 1.5G simulated sunlight irradiance (100 mW cm<sup>-2</sup>).

The IPCE spectra were measured at 1.0 V vs. RHE in 0.5M Na<sub>2</sub>SO<sub>4</sub> electrolyte using a monochromatic light source generated from a 150W Xenon-arc lamp (Newport, model 66902) equipped with a monochromator (model 75160) and a Merlin lock-in

detector (model 70105). Measurements were conducted over the wavelength range from 300 to 600 nm with a 20 nm interval. The monochromatic light intensity at each wavelength was calibrated with a calibrated reference cell (Thorlabs PDS1010-CAL). The IPCE at a given wavelength ( $\lambda$ ) was calculated using the following equation:<sup>6</sup>

$$\text{IPCE}(\lambda) = \frac{1240(\text{V} \times \text{nm})}{\lambda(\text{nm})} \times \frac{(J_{\text{light}} - J_{\text{dark}})(\text{mA cm}^{-2})}{P_{\text{mono}}(\text{mW cm}^{-2})} \times 100\% \quad (4)$$

where 1240 V nm represents a multiplication of Planck constant ( $h$ ) and the light speed ( $c$ ),  $\lambda$  is the incident light wavelength (nm),  $P_{\text{mono}}$  is the monochromatic illumination power intensity, and  $J_{\text{light}}$  and  $J_{\text{dark}}$  are the current density under illumination and in the dark, respectively.

### 1.5. PEIS and Mott-Schottky measurements

The PEIS measurements were conducted in a frequency range of 0.2 Hz to 100 kHz with an amplitude of 15 mV under constant AM1.5M simulated sunlight illumination (100 mWcm<sup>-2</sup>). The obtained PEIS data were analyzed using the Randles equivalent circuit model, and fitting was performed with ZView software (Scribner Associates). The effective capacitances associated with the CPEs were calculated using the expressions reported in the literature:

$$C_{\text{bulk}} = Y_{0,1}^{1/n_1} \left( \frac{1}{R_s} + \frac{1}{R_{\text{trap}} + R_{\text{ss}}} \right)^{n_1-1/n_1} \quad (5)$$

$$C_{\text{ss}} = Y_{0,2}^{1/n_2} \left( \frac{1}{R_{\text{trap}}} + \frac{1}{R_{\text{ss}}} \right)^{n_2-1/n_2} \quad (6)$$

where  $C_{\text{bulk}}$  represents the bulk capacitance of the space-charge layer,  $C_{\text{ss}}$  denotes the

surface capacitance at the semiconductor/electrolyte interface, and  $Y$  and  $n$  are parameters from the CPE fitting related to the impedance behavior. The  $R_s$  accounts for the combined resistance from the electrolyte, external contact layers, and conductive substrate. The  $R_{\text{trap}}$  reflects the bulk charge transport resistance within the photoanode, while  $R_{\text{ct}}$  corresponds to the interfacial charge transfer resistance at the semiconductor/electrolyte interface.

Mott-Schottky measurements were performed under dark conditions, with an anodic potential scan at a 15 mV AC amplitude and frequencies of 0.1, 0.2, 0.3, and 0.4 kHz. The carrier density at each frequency was calculated, and the average value was used to determine the carrier density in 0.5 M Na<sub>2</sub>SO<sub>4</sub> solution, following the Mott-Schottky equation:<sup>7</sup>

$$\frac{1}{C^2} = \frac{2}{\varepsilon_0 \varepsilon A^2 q N_D} \times (V - V_{\text{fb}} - \frac{k_B T}{q}) \quad (7)$$

where  $C$  is the space-charge capacitance,  $V$  is the applied potential versus RHE,  $V_{\text{fb}}$  is the flat-band potential versus RHE,  $N_D$  is the charge carrier density,  $\varepsilon_0$  is the vacuum permittivity ( $8.854 \times 10^{-14}$  C V<sup>-1</sup> cm<sup>-1</sup>),  $\varepsilon$  is dielectric constant of the semiconductor (taken as 4.7 for the ZnIn<sub>2</sub>S<sub>4</sub>),<sup>7</sup>  $k_B$  is Boltzmann constant ( $1.381 \times 10^{-23}$  J K<sup>-1</sup>),  $q$  is the electronic charge ( $1.602 \times 10^{-19}$  C), and  $T$  is the absolute temperature.

## 1.6. Supplemented measurements and equations.

The OCP decays during the light on/off transient were recorded after illuminating the photoanodes for 10 min under the same conditions use in the PEC measurements.

The carrier lifetime ( $\tau_n$ ) was calculated using the following equation <sup>8</sup>:

$$\tau_n = \frac{k_B T}{q} \left( \frac{d(\text{OCP})}{dt} \right)^{-1} \quad (8)$$

where  $\tau_n$  is the potential-dependent carrier lifetime,  $k_B$  is the Boltzmann constant,  $T$  is the temperature in Kelvin,  $q$  is the electronic charge, and  $d(\text{OCP})/dt$  represents derivative of the OCP transient decay.

The  $\eta_{\text{sep}}$  and  $\eta_{\text{inj}}$  were evaluated using the following equations:<sup>9</sup>

$$J_{\text{abs}} = \frac{q}{hc} \int_{\lambda} \lambda E(\lambda) A(\lambda) d\lambda = \int_{\lambda} \frac{\lambda E(\lambda) A(\lambda)}{1240} d\lambda \quad (9)$$

$$\eta_{\text{sep}} = J_{\text{ph}}^{\text{Na}_2\text{SO}_3 + \text{Na}_2\text{S}} / J_{\text{abs}} \quad (10)$$

$$\eta_{\text{inj}} = J_{\text{ph}}^{\text{Na}_2\text{SO}_4} / J_{\text{ph}}^{\text{Na}_2\text{SO}_3 + \text{Na}_2\text{S}} \quad (11)$$

Here,  $J_{\text{abs}}$  is the maximum photocurrent density, assuming that all the absorbed photons in the  $\text{ZnIn}_2\text{S}_4$  samples are efficiently converted into electrical current.  $E(\lambda)$  and  $A(\lambda)$  both functions of photon wavelength ( $\lambda$ ), where  $E(\lambda)$  represents the spectral irradiance of the AM 1.5 G solar spectrum (ASTM G173-03), and  $A(\lambda)$  denotes the absorbance of the  $\text{ZnIn}_2\text{S}_4$  samples obtained from the UV-Visible absorption spectrum. The constants  $h$ ,  $q$ , and  $c$  are the Planck constant, electronic charge, the light speed, respectively. In addition,  $J_{\text{ph}}^{\text{Na}_2\text{SO}_3 + \text{Na}_2\text{S}}$  is the photocurrent density measured in 0.35M  $\text{Na}_2\text{SO}_3$  and 0.25M  $\text{Na}_2\text{S}$  mixed electrolyte, which served as hole scavengers, ensuring the hole injection rate approaching 100%. Meanwhile,  $J_{\text{ph}}^{\text{Na}_2\text{SO}_4}$  is the photocurrent density measured in 0.5M  $\text{Na}_2\text{SO}_4$ , using the  $J$ - $V$  curve data.

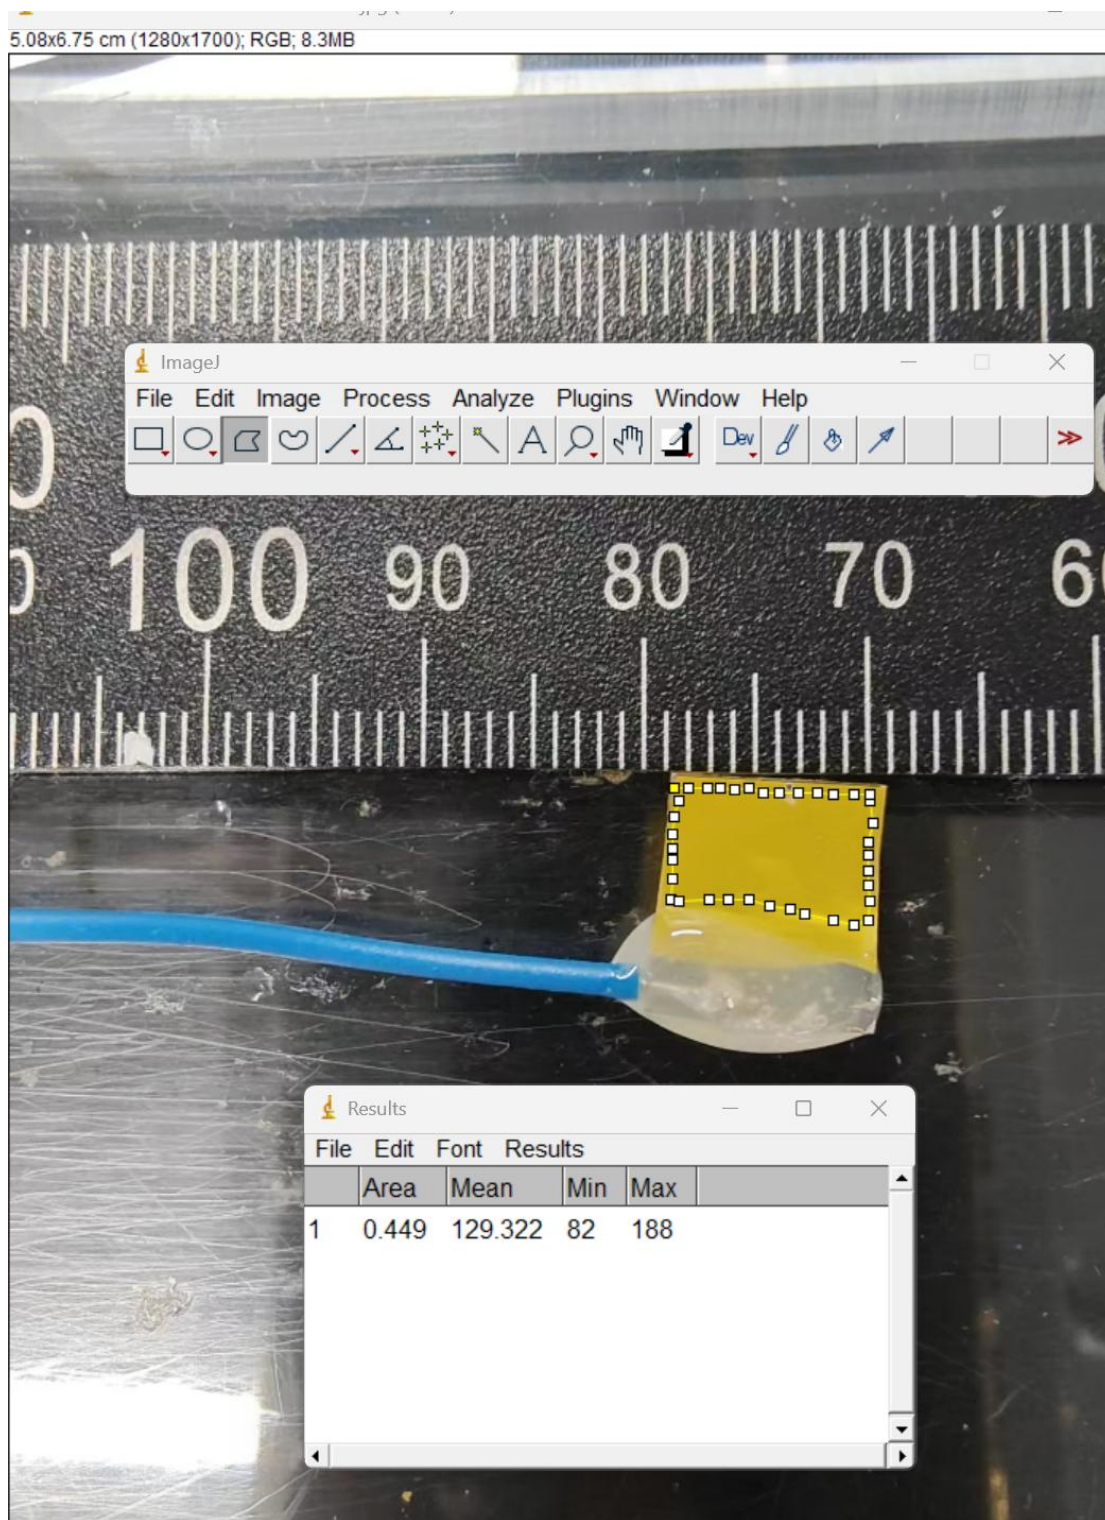

**Fig. S1.** Photographic image of fabricated photoanode. The exposed area of the electrode was measured with ImageJ1.53k software.

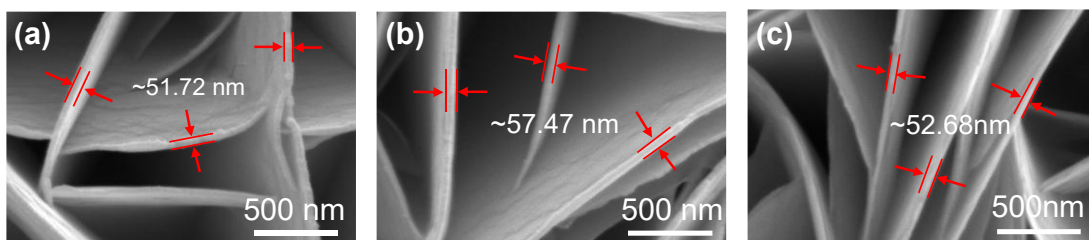

**Fig. S2.** Top-view SEM images for as-prepared  $\text{ZnIn}_2\text{S}_4$  (a),  $\text{O-ZnIn}_2\text{S}_4$  (b), and  $\text{Sb:O-ZnIn}_2\text{S}_4$  (c) nanosheet films. All samples exhibit an ordered two-dimensional (2D) nanosheet morphology, with an average thickness of approximately 50 nm.

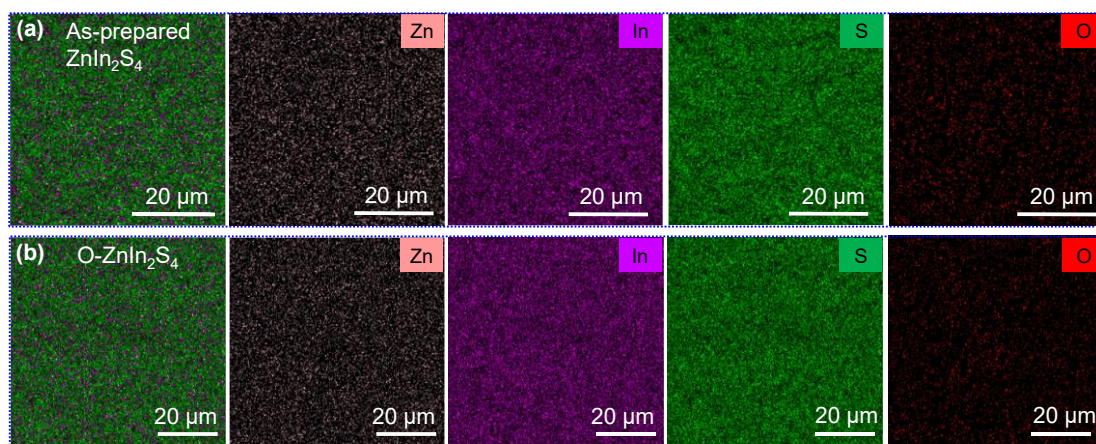

**Fig. S3.** SEM-EDS elemental mappings of as-prepared  $\text{ZnIn}_2\text{S}_4$  (a) and  $\text{O-ZnIn}_2\text{S}_4$  (b) samples.

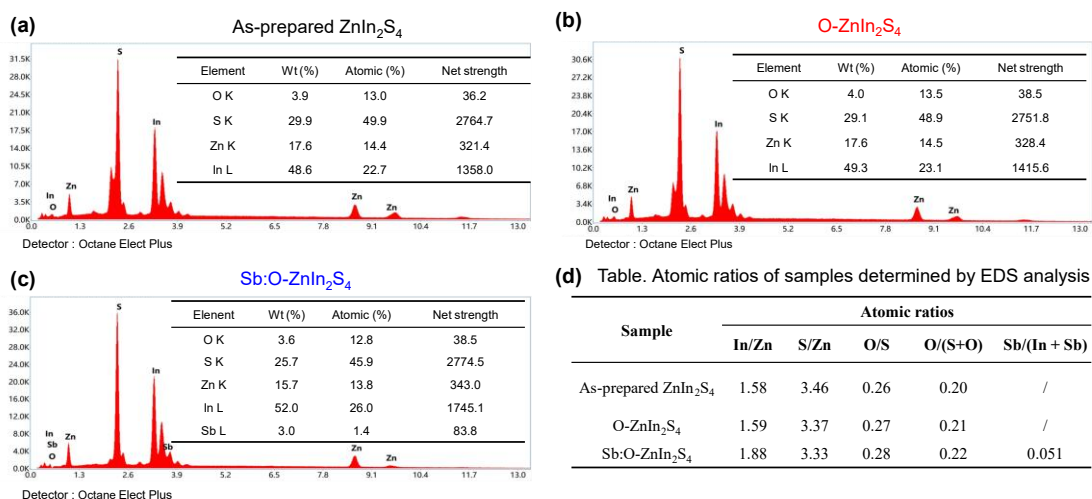

**Fig. S4.** (a-c) SEM-EDS elemental mappings analysis of as-prepared  $\text{ZnIn}_2\text{S}_4$  (a), O- $\text{ZnIn}_2\text{S}_4$  (b), and Sb:O- $\text{ZnIn}_2\text{S}_4$  (c) samples. (d) The corresponding atomic ratios of the three samples were obtained through EDS mapping analysis.

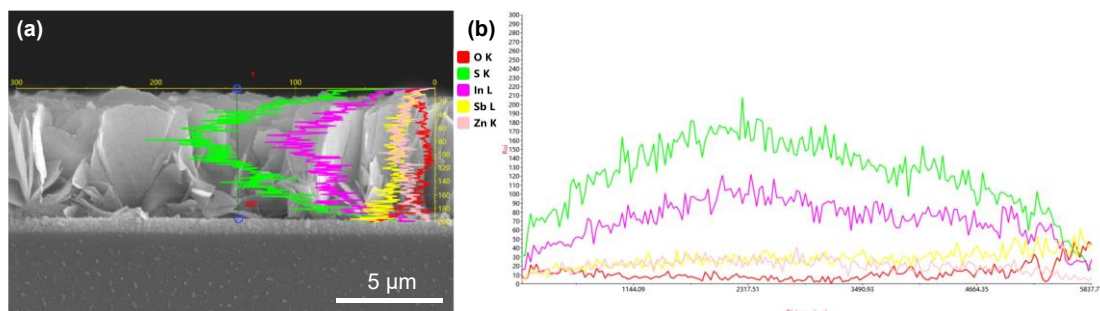

**Fig. S5.** STM-EDS line scan of elements (Zn, In, Sb, S, O) in the Sb:O- $\text{ZnIn}_2\text{S}_4$  sample.

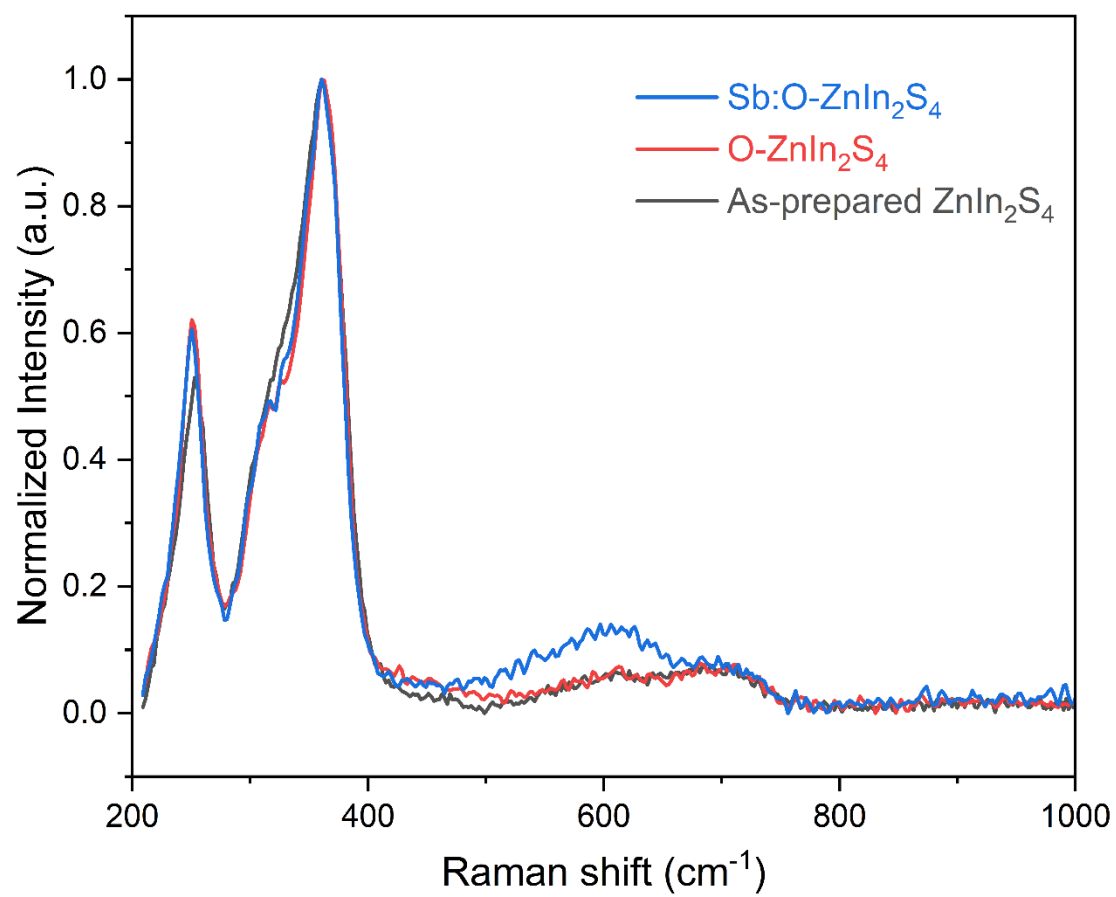

**Fig. S6.** Normalized Raman spectra of as-prepared ZnIn<sub>2</sub>S<sub>4</sub>, O-ZnIn<sub>2</sub>S<sub>4</sub>, and Sb:O-ZnIn<sub>2</sub>S<sub>4</sub> samples.



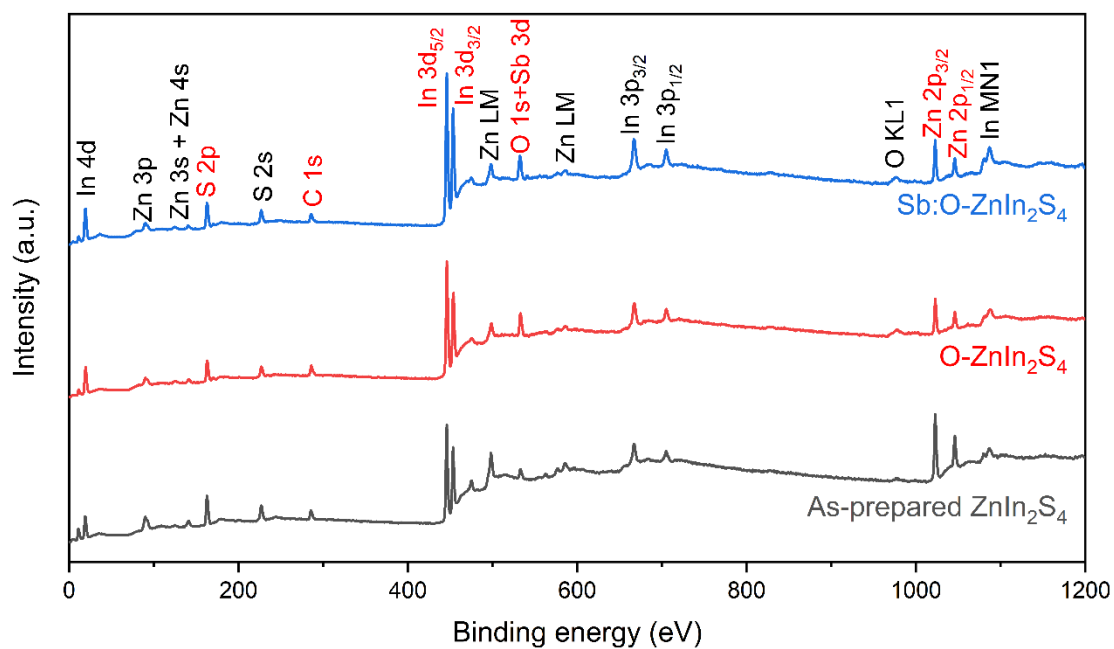

**Fig. S7.** XPS survey spectra of as-prepared  $\text{ZnIn}_2\text{S}_4$ ,  $\text{O-ZnIn}_2\text{S}_4$ , and  $\text{Sb:O-ZnIn}_2\text{S}_4$  samples. The charging shift for these spectra compensated using the C 1s at 284.8 eV as the reference.

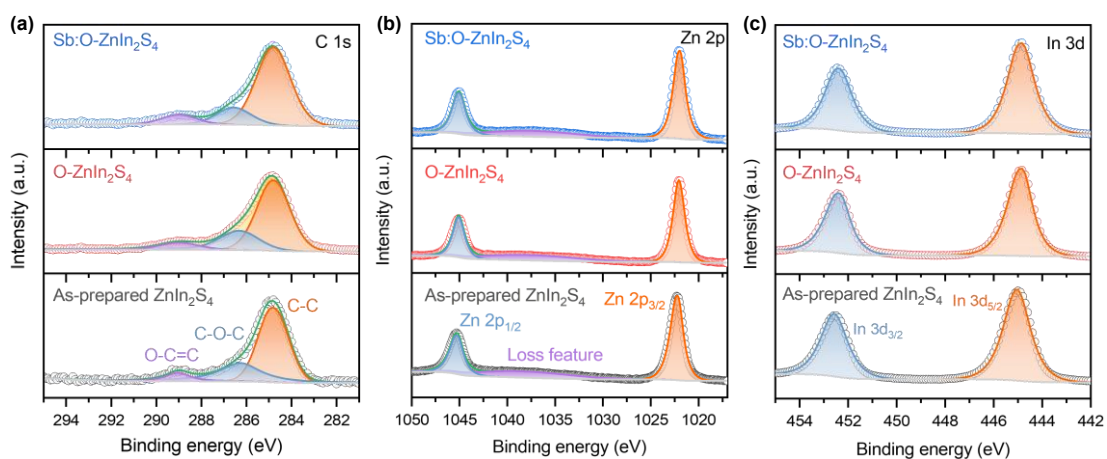

**Fig. S8.** XPS core-level spectra of C 1s (a), Zn 2p (b), and In 3d (c) for as-prepared  $\text{ZnIn}_2\text{S}_4$ ,  $\text{O-ZnIn}_2\text{S}_4$ , and  $\text{Sb:O-ZnIn}_2\text{S}_4$  samples.

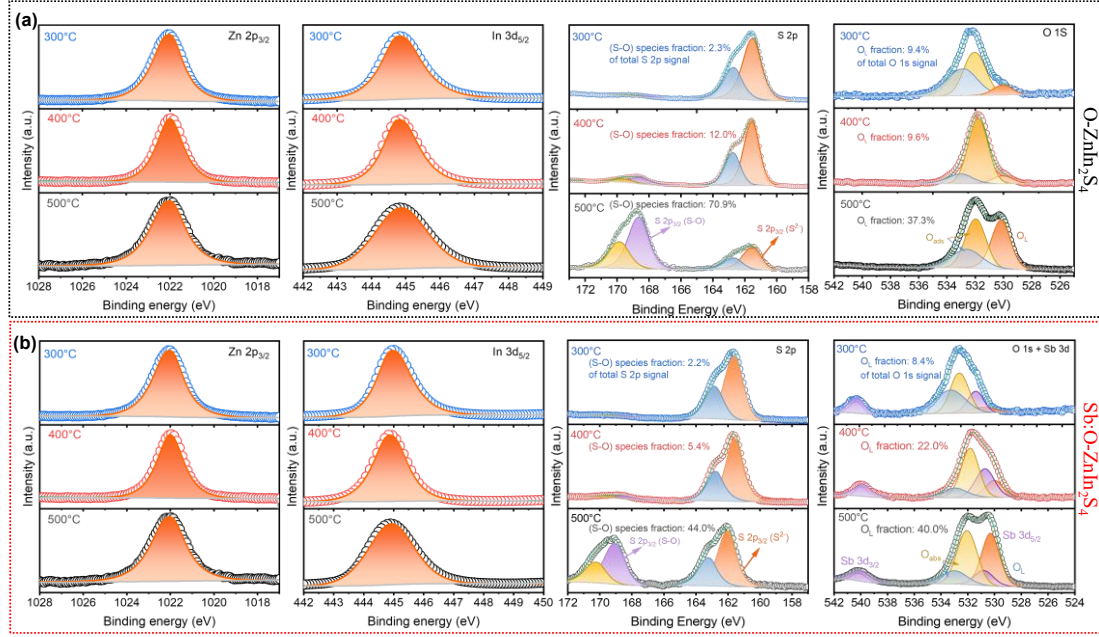

**Fig. S9.** Temperature-dependent HAXPES analysis of O-ZnIn<sub>2</sub>S<sub>4</sub> (a) and Sb:O-ZnIn<sub>2</sub>S<sub>4</sub> (b) after air annealing under identical conditions. S 2p spectra shows that S-O components increase with temperature in both cases but remains consistently lower in Sb:O-ZnIn<sub>2</sub>S<sub>4</sub> than in O-ZnIn<sub>2</sub>S<sub>4</sub> at the same temperature. Moreover, the lattice-related O fraction or O/(S+O) ratio versus annealing temperature shows a monotonic increase with temperature and consistently higher lattice O in Sb:O-ZnIn<sub>2</sub>S<sub>4</sub> compared with O-ZnIn<sub>2</sub>S<sub>4</sub> under identical annealing conditions. These results support that Sb promotes O incorporation into lattice/near-lattice configurations while mitigating sulfur over-oxidation during air annealing.

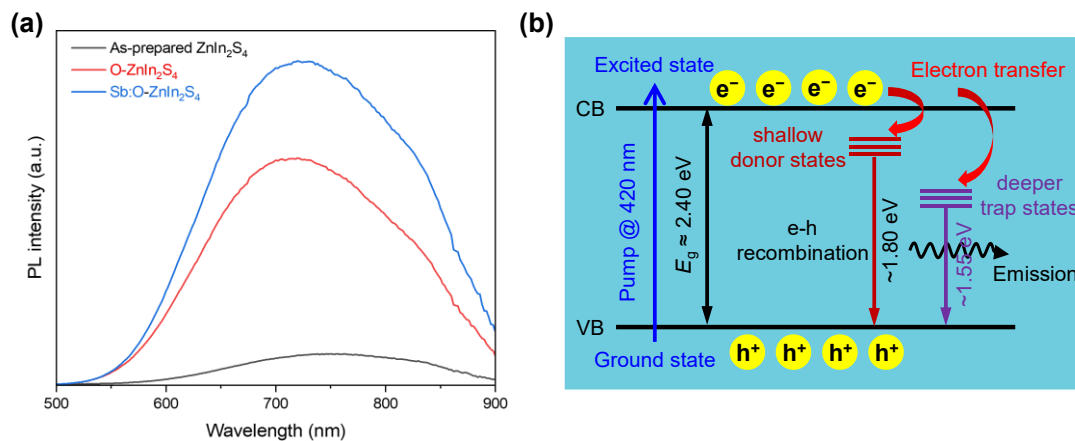

**Fig. S10.** (a) Room temperature PL spectra for as-prepared  $\text{ZnIn}_2\text{S}_4$ , O- $\text{ZnIn}_2\text{S}_4$ , and Sb:O- $\text{ZnIn}_2\text{S}_4$  samples measured under 420 nm laser excitation. (b) Schematic illustration of the mechanisms involved in the PL emission related to defects in  $\text{ZnIn}_2\text{S}_4$ .

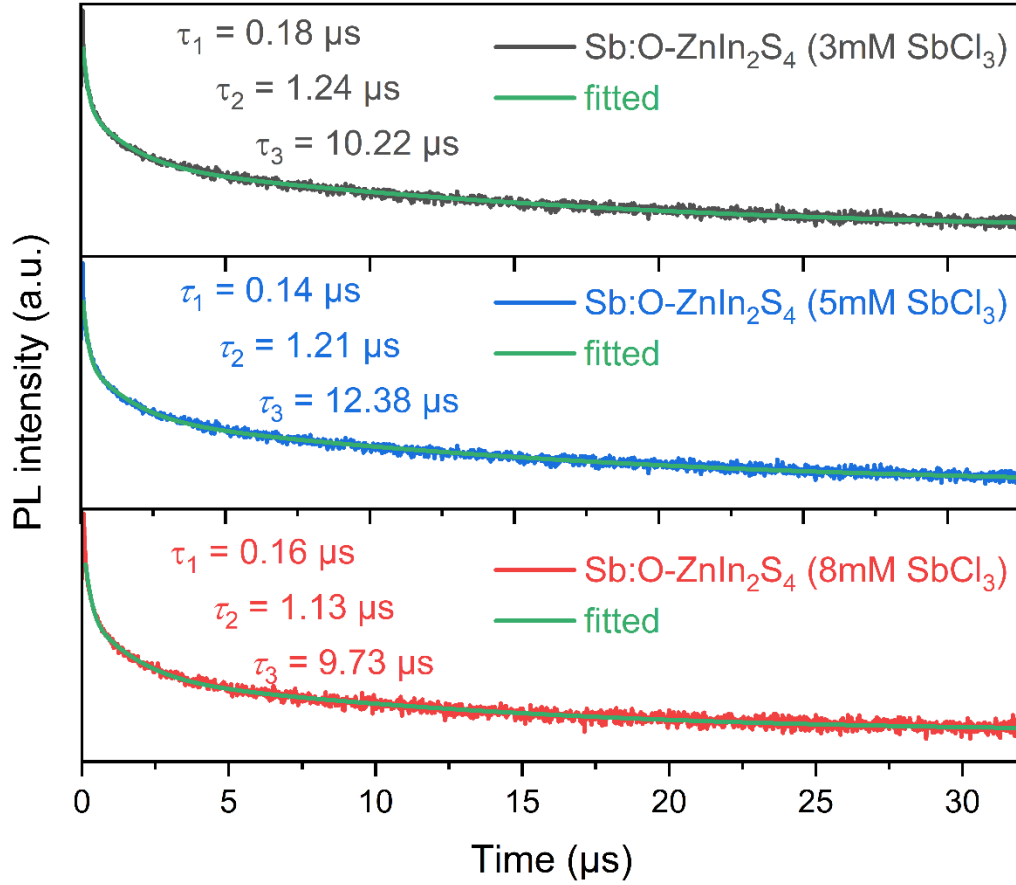

**Fig. S11.** TRPL decay curves of Sb:O-ZnIn<sub>2</sub>S<sub>4</sub> samples with different SbCl<sub>3</sub> concentrations, recorded at about 690 nm under 420 nm laser excitation. TRPL provides direct kinetic evidence that moderate Sb incorporation suppresses trap-assisted recombination, whereas excessive Sb reverses this trend. The optimized 5 mM Sb sample shows the longest  $\tau_{AV}$  (10.15 μs) and the largest  $f_3$  (80.4%), accompanied by the smallest  $f_1$  (4.1%) (**Table S1**), indicating suppressed non-radiative recombination via surface/interface traps. In contrast, at higher Sb concentration (8 mM),  $\tau_{AV}$  decreases to 6.74 μs and  $f_3$  drops to 66.3%, while both the  $f_1$  (8.8%) and the  $f_2$  (25.0%) increase, suggesting an increased population of non-radiative traps and deep/intermediate trap-mediated recombination pathways.

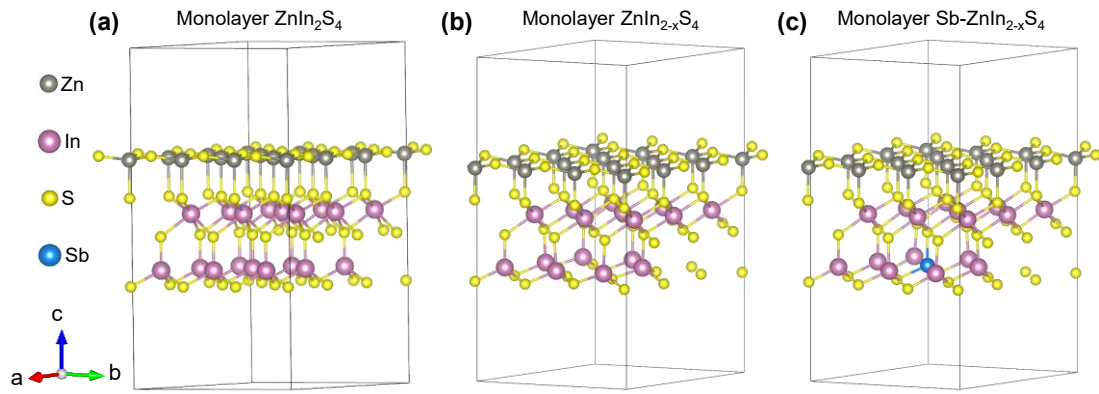

**Fig. S12.** (a) Constructed monolayer  $\text{ZnIn}_2\text{S}_4$  supercell. (b)  $\text{ZnIn}_2\text{S}_4$  supercell containing In vacancies (termed as  $\text{ZnIn}_{2-x}\text{S}_4$ ), with an (In vacancy)/(total In atom) ratio of 0.1111. (c)  $\text{ZnIn}_2\text{S}_4$  supercell (termed as  $\text{Sb-ZnIn}_{2-x}\text{S}_4$ ) with partial substitution of In vacancies or In atoms by Sb, where the  $\text{Sb}/(\text{Sb} + \text{In})$  ratio is 0.058 and the (In vacancy)/(total In atom) ratio is 0.056.

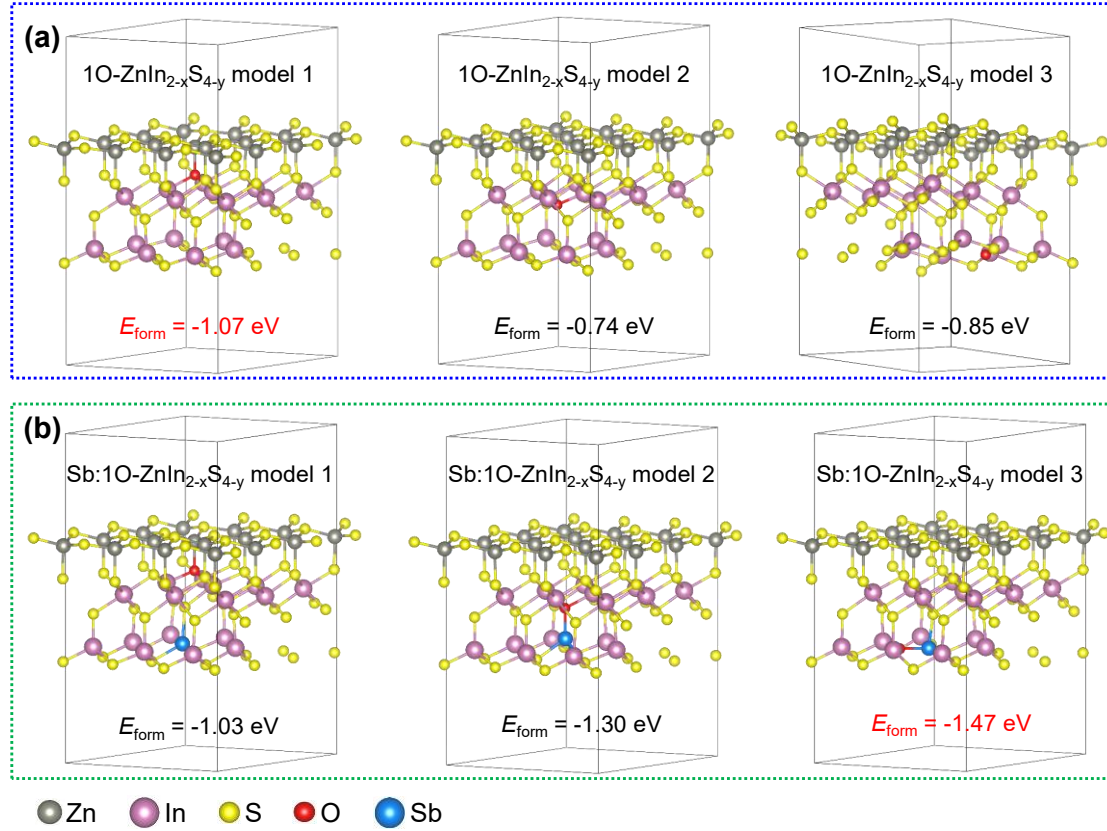

**Fig. S13.** (a) Simulated O-substituted ZnIn<sub>2-x</sub>S<sub>4</sub> structures with one O atom replacing different equivalent S sites (denoted as 1O-ZnIn<sub>2-x</sub>S<sub>4-y</sub>) and their corresponding formation energies ( $E_{\text{form}}$ ). The O/(O+S) ratio in this configuration is 0.0278. Model 1 exhibits the lowest  $E_{\text{form}}$ , indicating the most favorable single O-for-S substitution. (b) Simulated Sb- and O-cosubstituted ZnIn<sub>2-x</sub>S<sub>4</sub> structures with one O atom replacing different equivalent S sites (termed as Sb:1O-ZnIn<sub>2-x</sub>S<sub>4-y</sub>) and their corresponding  $E_{\text{form}}$ . Upon Sb incorporation, Model 3 shows the lowest  $E_{\text{form}}$ , suggesting it represents the most stable structure at the same O substitution level.

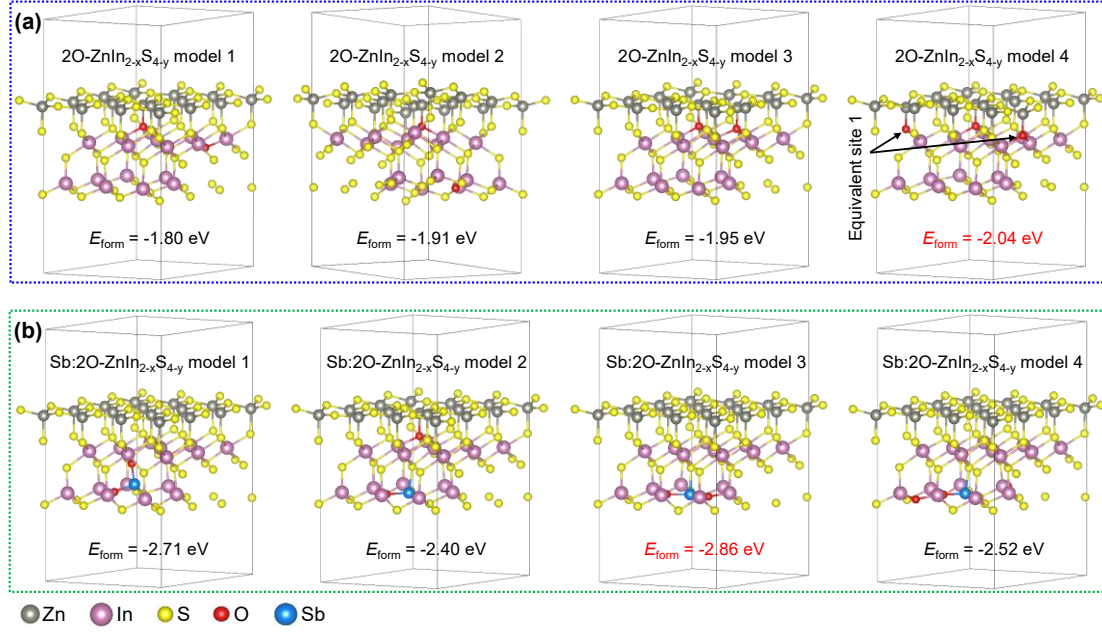

**Fig. S14.** (a) Simulated 2O-ZnIn<sub>2-x</sub>S<sub>4-y</sub> structures and their corresponding  $E_{\text{form}}$ , where two O atoms substitute different equivalent S sites. The O/(O+S) ratio in this configuration is 0.0556. Model 4 represents the most favorable 2O-for-S substitution structure. (b) Simulated Sb:2O-ZnIn<sub>2-x</sub>S<sub>4-y</sub> structures and their corresponding  $E_{\text{form}}$ . Model 3 is identified as the most stable structure.

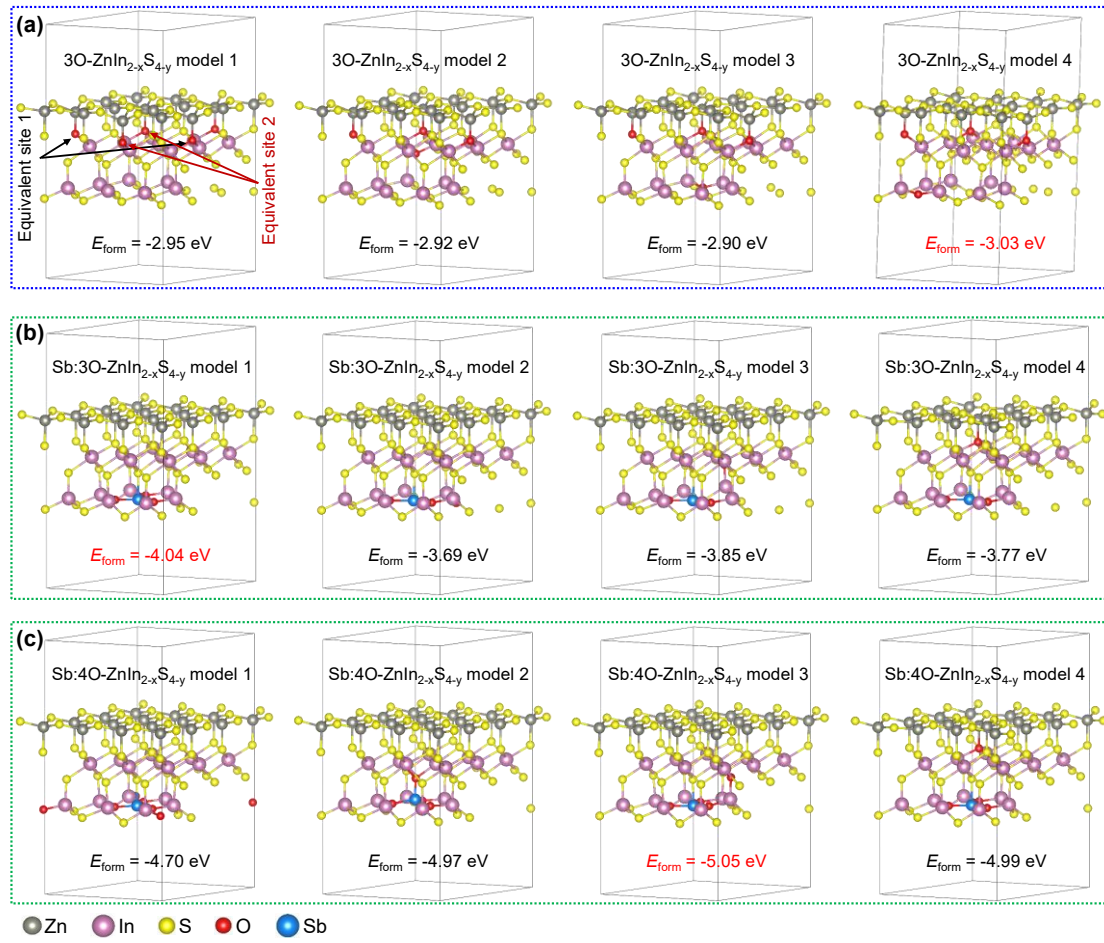

**Fig. S15.** (a) Simulated 3O-ZnIn<sub>2-x</sub>S<sub>4-y</sub> structures with three O substituting different equivalent S sites and their corresponding  $E_{\text{form}}$ . The O/(O+S) ratio is 0.0833, close to the experimentally measured O content of the O-ZnIn<sub>2</sub>S<sub>4</sub> sample. Model 5 exhibits the lowest  $E_{\text{form}}$  and was used as the structural model for subsequent density of state (DOS) and partial DOS (PDOS) calculations. (b) Simulated Sb:3O-ZnIn<sub>2-x</sub>S<sub>4-y</sub> structures and their corresponding  $E_{\text{form}}$ , with Model 1 identified as the most stable structure. (c) Simulated Sb:4O-ZnIn<sub>2-x</sub>S<sub>4-y</sub> structures with four O atoms substituting different equivalent S sites and their corresponding  $E_{\text{form}}$ . The O/(O+S) ratio is 0.1111, close to the experimental measured O content of the Sb:O-ZnIn<sub>2</sub>S<sub>4</sub> sample, and model 3 was used for subsequent DOS and PDOS calculations.



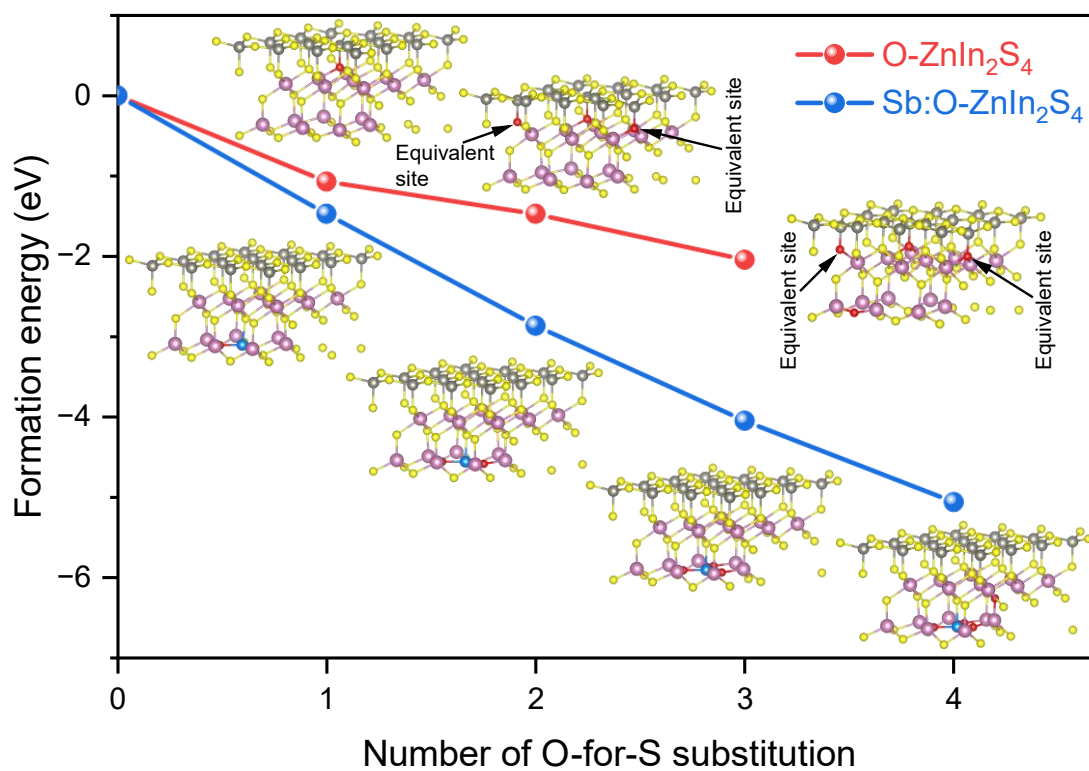

**Fig. S16.** Relationship between  $E_{\text{form}}$  and the number of O substitutions for the most stable structures in the O-ZnIn<sub>2</sub>S<sub>4</sub> and Sb:O-ZnIn<sub>2</sub>S<sub>4</sub> systems. Insets show the corresponding optimized structural models.

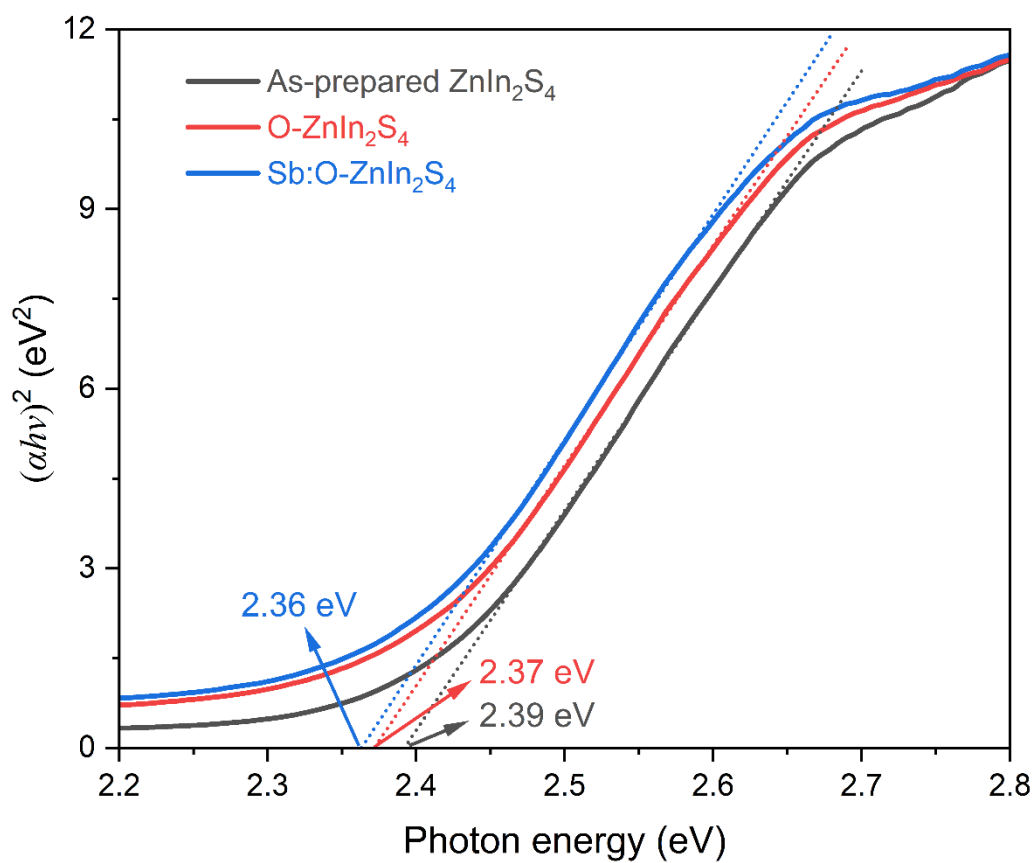

**Fig. S17.** Tauc plots of UV-vis absorption spectra for as-prepared  $\text{ZnIn}_2\text{S}_4$ , O- $\text{ZnIn}_2\text{S}_4$ , and Sb:O- $\text{ZnIn}_2\text{S}_4$  samples.  $\alpha$ , absorption coefficient;  $h$ , Planck constant;  $\nu$ , photon frequency.

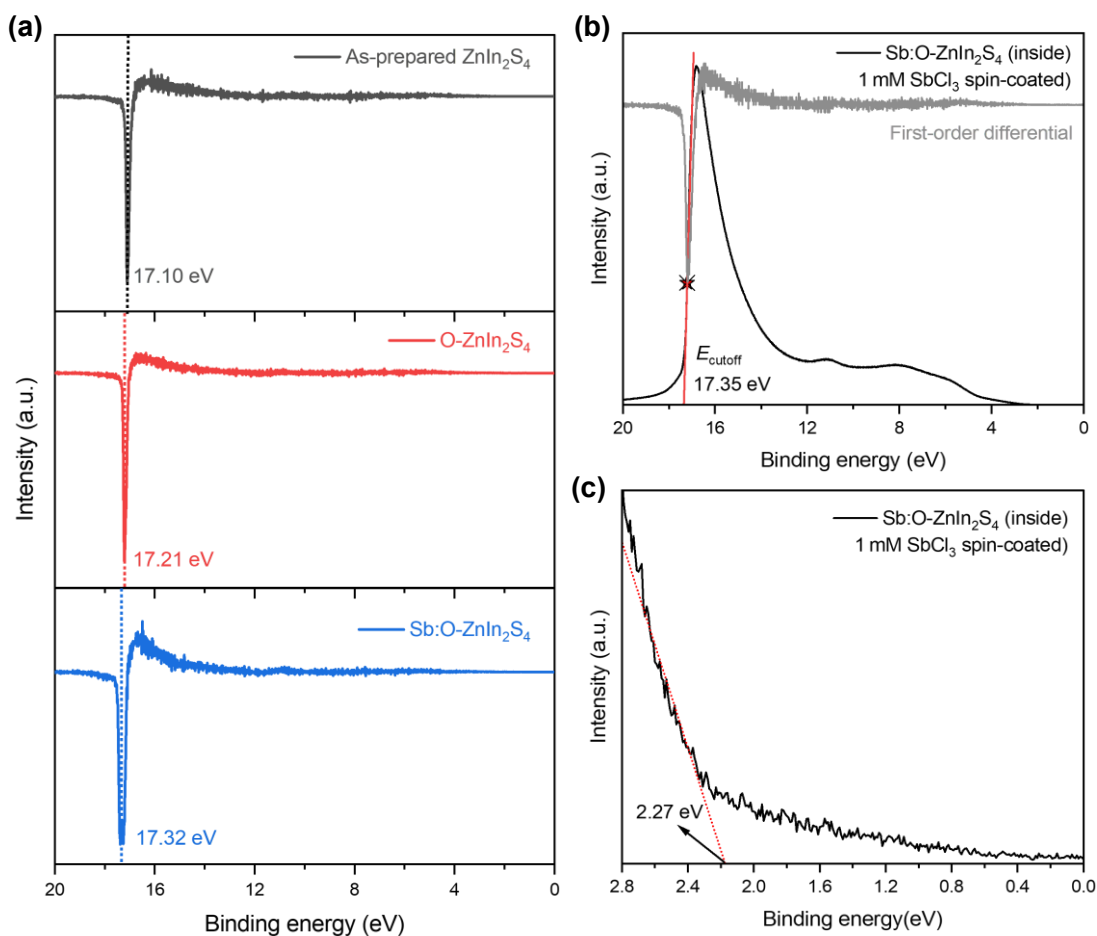

**Fig. S18.** (a) First-order differential of the UPS spectra for as-prepared  $\text{ZnIn}_2\text{S}_4$ , O- $\text{ZnIn}_2\text{S}_4$ , and Sb:O- $\text{ZnIn}_2\text{S}_4$  samples. The minimum points of the first derivative curves correspond to the tangent points in the high binding energy region of the UPS spectra (**Fig. 4b**). The intersection of the tangent line with the X-axis defines the high binding energy cut-off ( $E_{\text{cutoff}}$ ). (b) UPS spectra from the low Sb concentration region in Sb:O- $\text{ZnIn}_2\text{S}_4$  sample (denoted as Sb:O- $\text{ZnIn}_2\text{S}_4$  (inside)), obtained by spin-coating with a 1 mM  $\text{SbCl}_3$  solution. (c) Valence band spectra of Sb:O- $\text{ZnIn}_2\text{S}_4$  (inside) in the low binding energy region of the UPS spectra, used to determine the valence band position.

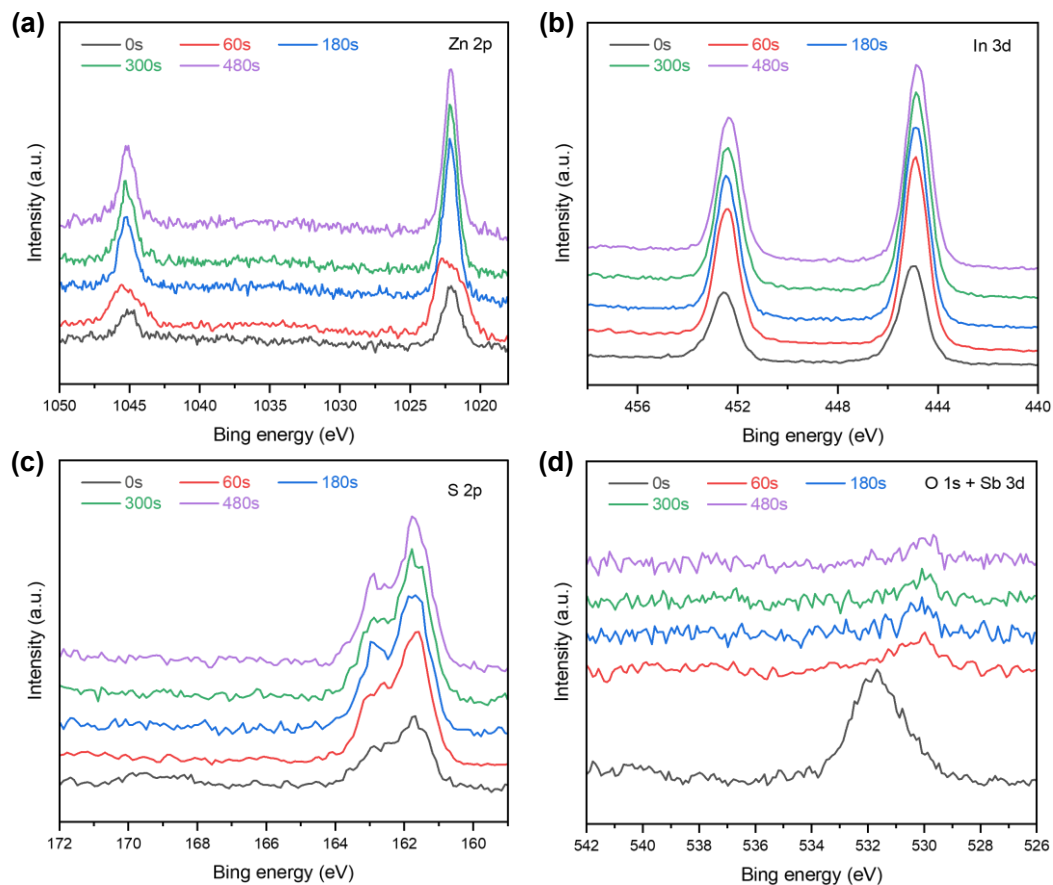

**Fig. S19.** XPS depth profile of the core-level spectra for Zn 2*p* (a), In 3*d* (b), S 2*p* (c), and (O 1*s* + Sb 3*d*) (d) in the Sb:O-ZnIn<sub>2</sub>S<sub>4</sub> sample.

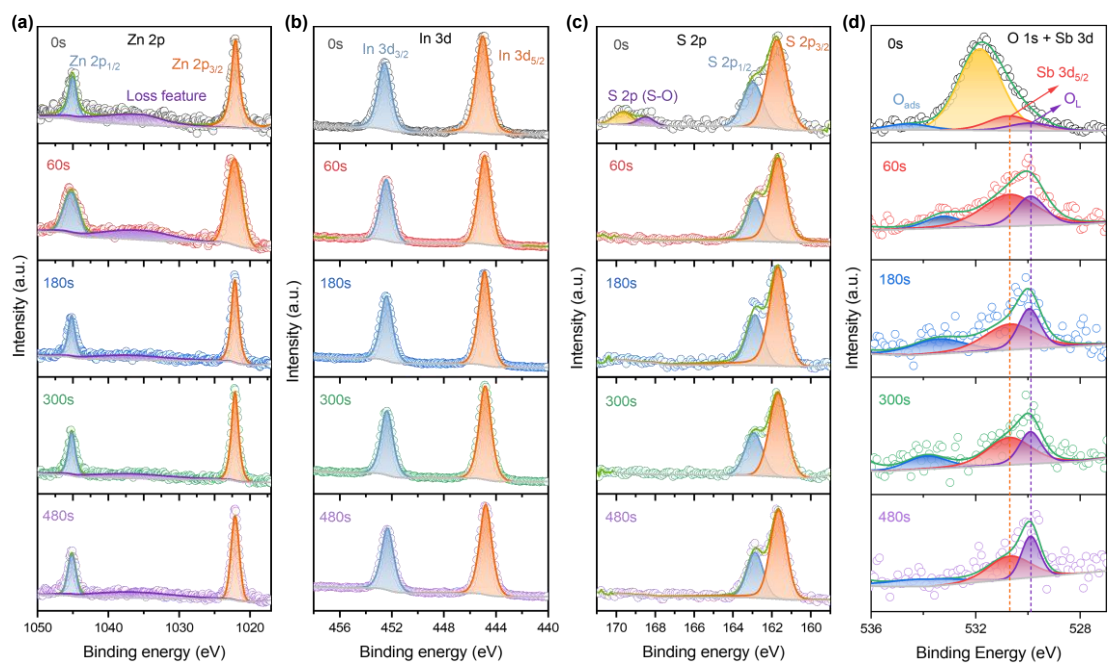

**Fig. S20.** Fitted core-level spectra of Zn 2p (a), In 3d (b), S 2p (c), and (O 1s + Sb 3d<sub>5/2</sub>) (d) for the Sb:O-ZnIn<sub>2</sub>S<sub>4</sub> sample at different XPS depth etching times.

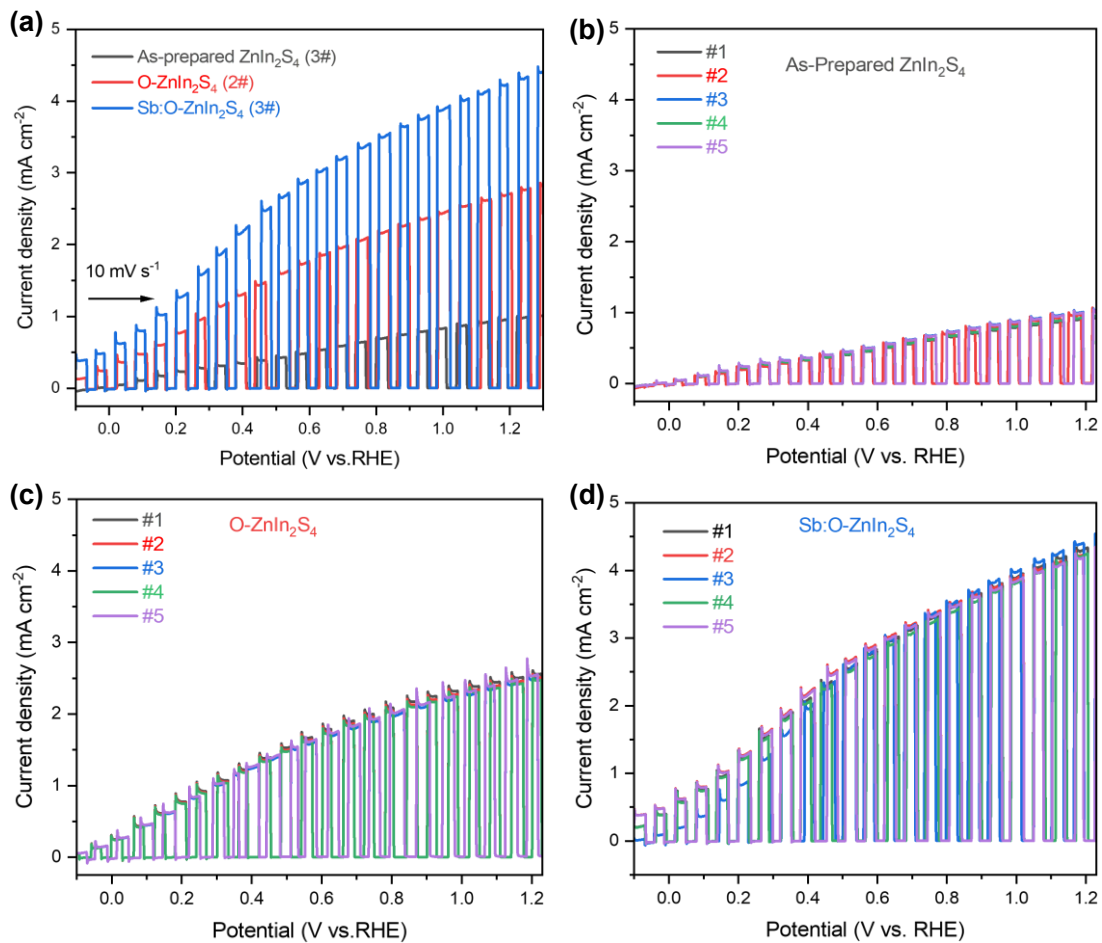

**Fig. S21.** (a)  $J$ - $V$  curves of as-prepared ZnIn<sub>2</sub>S<sub>4</sub> (sample #3 in panel b), O-ZnIn<sub>2</sub>S<sub>4</sub> (sample #2 in panel c), and Sb:O-ZnIn<sub>2</sub>S<sub>4</sub> (sample #3 in panel d) photoanodes measured in 0.5M Na<sub>2</sub>SO<sub>4</sub> (pH 6.8) under chopped AM1.5G simulated sunlight (100 mW cm<sup>-2</sup>) with a scan rate of 10 mV s<sup>-1</sup>. (b-d) Reproducibility of the chopped  $J$ - $V$  curves measured for five independently prepared electrodes for each sample type, including (b) as-prepared ZnIn<sub>2</sub>S<sub>4</sub>, (c) O-ZnIn<sub>2</sub>S<sub>4</sub>, and (d) Sb:O-ZnIn<sub>2</sub>S<sub>4</sub> photoanodes.

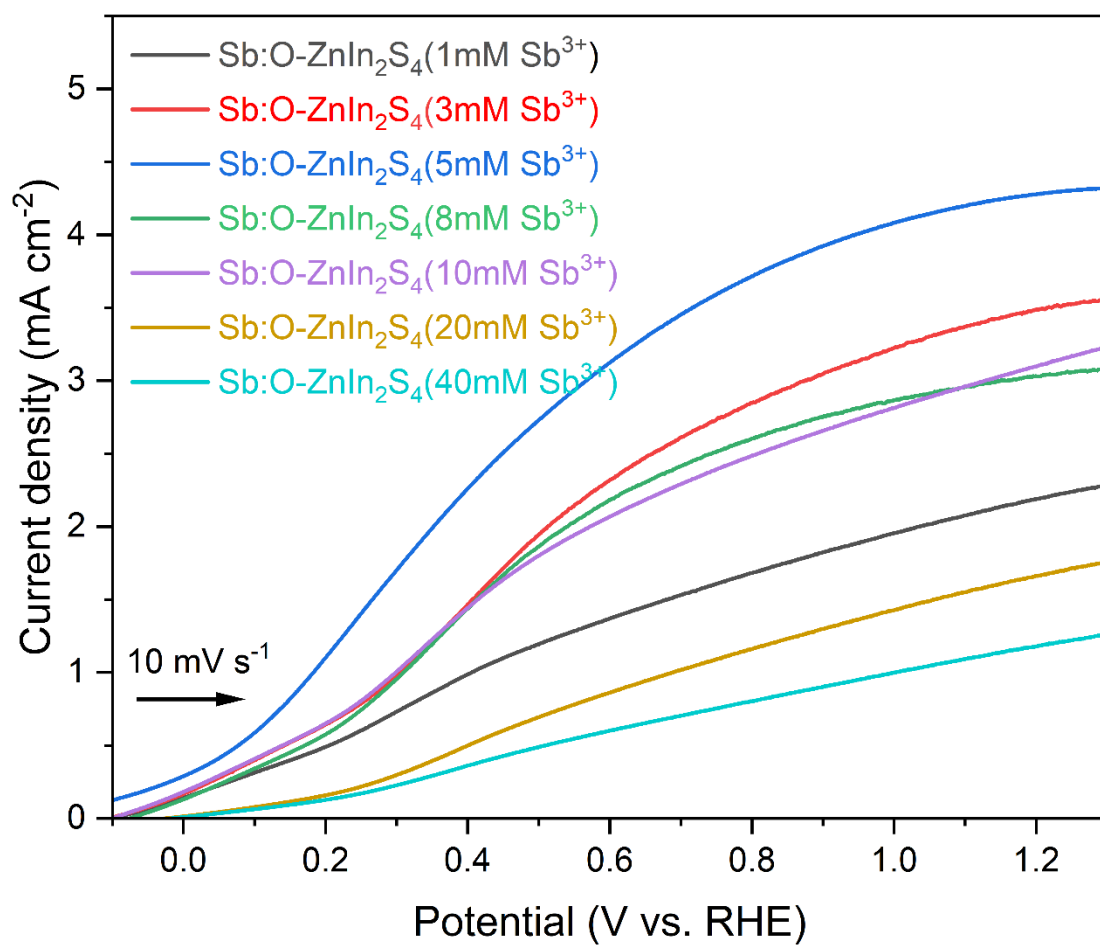

**Fig. S22.**  $J$ - $V$  curves for Sb:O-ZnIn<sub>2</sub>S<sub>4</sub> photoanodes with different Sb incorporation concentrations, measured in 0.5M Na<sub>2</sub>SO<sub>4</sub> (pH 6.8) under continuous AM1.5G simulated sunlight (100 mW cm<sup>-2</sup>) with a scan rate of 10 mV s<sup>-1</sup>.

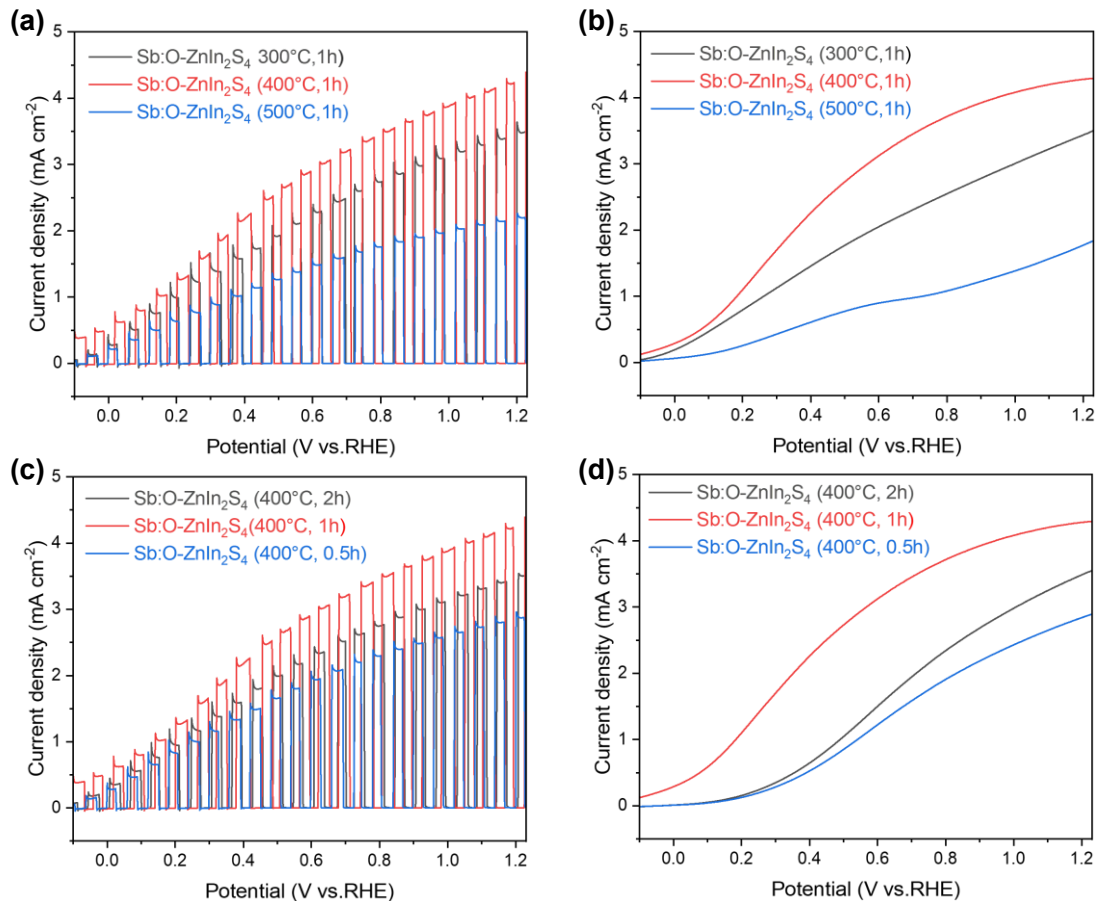

**Fig. S23.** Annealing temperature and time dependence of the PEC performance of O-ZnIn<sub>2</sub>S<sub>4</sub> and Sb:O-ZnIn<sub>2</sub>S<sub>4</sub> photoanodes measured in 0.5 M Na<sub>2</sub>SO<sub>4</sub> (pH 6.8) under AM 1.5G illumination (100 mW cm<sup>-2</sup>). (a, b) *J-V* curves of photoanodes annealed at different temperatures. (c, d) *J-V* curves of photoanodes annealed for different durations. The optimal condition is 400 °C for 1 h. Lower temperature or shorter time results in insufficient lattice O incorporation, whereas higher temperature or longer time leads to excessive surface oxidation, consistent with the increased S-O contribution.



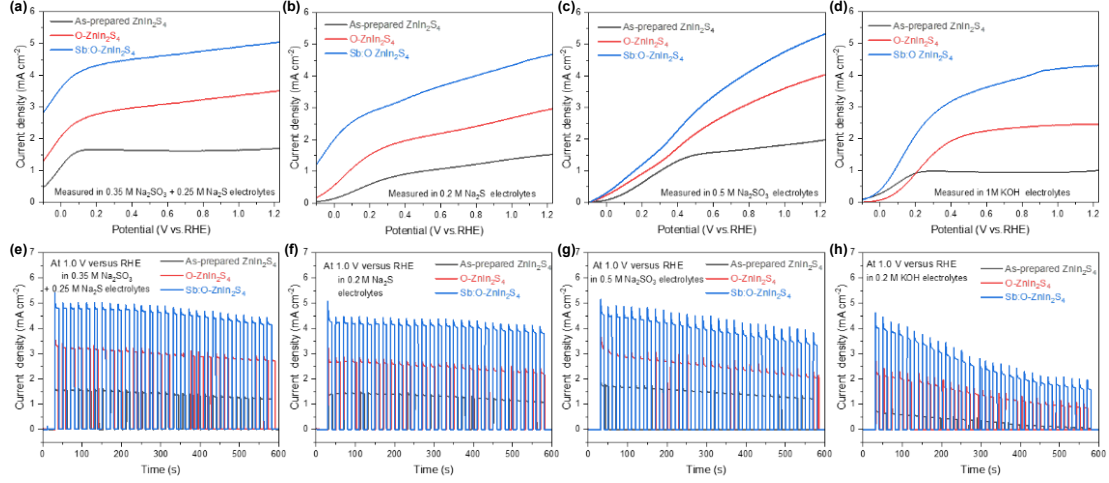

**Fig. S24.** (a-d)  $J$ - $V$  curves of as-prepared ZnIn<sub>2</sub>S<sub>4</sub>, O-ZnIn<sub>2</sub>S<sub>4</sub>, and Sb:O-ZnIn<sub>2</sub>S<sub>4</sub> photoanodes measured under AM1.5G simulated sunlight (100 mW cm<sup>-2</sup>) in commonly used electrolytes for sulfide-based photoelectrochemical testing, including 0.35 M Na<sub>2</sub>SO<sub>3</sub> + 0.25 M Na<sub>2</sub>S (pH 13.5) (a), 0.2 M Na<sub>2</sub>S (pH 13.0) (b), 0.5 M Na<sub>2</sub>SO<sub>3</sub> (pH 9.8) (c), and 1 M KOH (pH 14) (d). (e-h) The corresponding chopped  $J$ - $T$  curves were recorded in the same electrolytes at 1.0 V versus RHE under AM 1.5G illumination. Across all these electrolytes, the ZnIn<sub>2</sub>S<sub>4</sub>-based photoanodes exhibit the same performance ranking as in neutral Na<sub>2</sub>SO<sub>4</sub>, namely that O incorporation and subsequent Sb modification systematically enhance the PEC activity. electrolytes containing hole scavengers (Na<sub>2</sub>SO<sub>3</sub> and/or Na<sub>2</sub>S) generally suppress surface hole accumulation and therefore mitigate oxidative attack on sulfide lattices, often leading to higher apparent photocurrents and improved short-term stability compared with a purely supporting electrolyte. By contrast, strongly alkaline media (KOH) can accelerate surface reconstruction and sulfide oxidation under anodic bias due to stronger nucleophilic/oxidizing conditions. Against this backdrop, the improved behavior of Sb:O-ZnIn<sub>2</sub>S<sub>4</sub> could be rationalized by our spectroscopic evidence that Sb promotes lattice/near-lattice O incorporation while suppressing the formation of surface oxidized sulfur species.

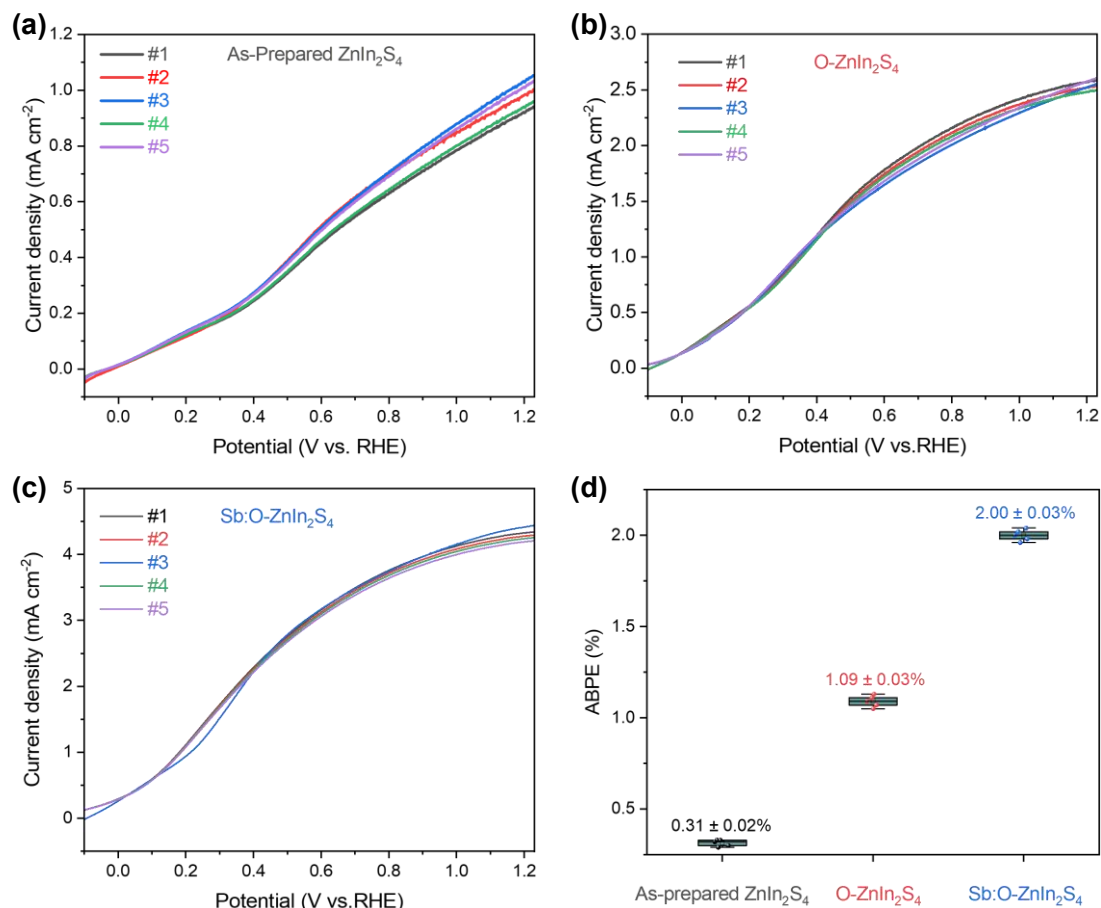

**Fig. S25.** Reproducibility of the PEC performance of ZnIn<sub>2</sub>S<sub>4</sub>-based photoanodes. (a-c)  $J-V$  curves for batches of five samples are shown in (a) as-prepared ZnIn<sub>2</sub>S<sub>4</sub>, (b) O-ZnIn<sub>2</sub>S<sub>4</sub>, and (c) Sb:O-ZnIn<sub>2</sub>S<sub>4</sub> photoanodes. The  $J-V$  curves for the representative (champion) photoanodes under each condition are reported in **Fig. 5a**. (d) Statistical distribution of the ABPEs for the corresponding photoanodes. The average ABPEs and the standard deviations are shown in the box chart.

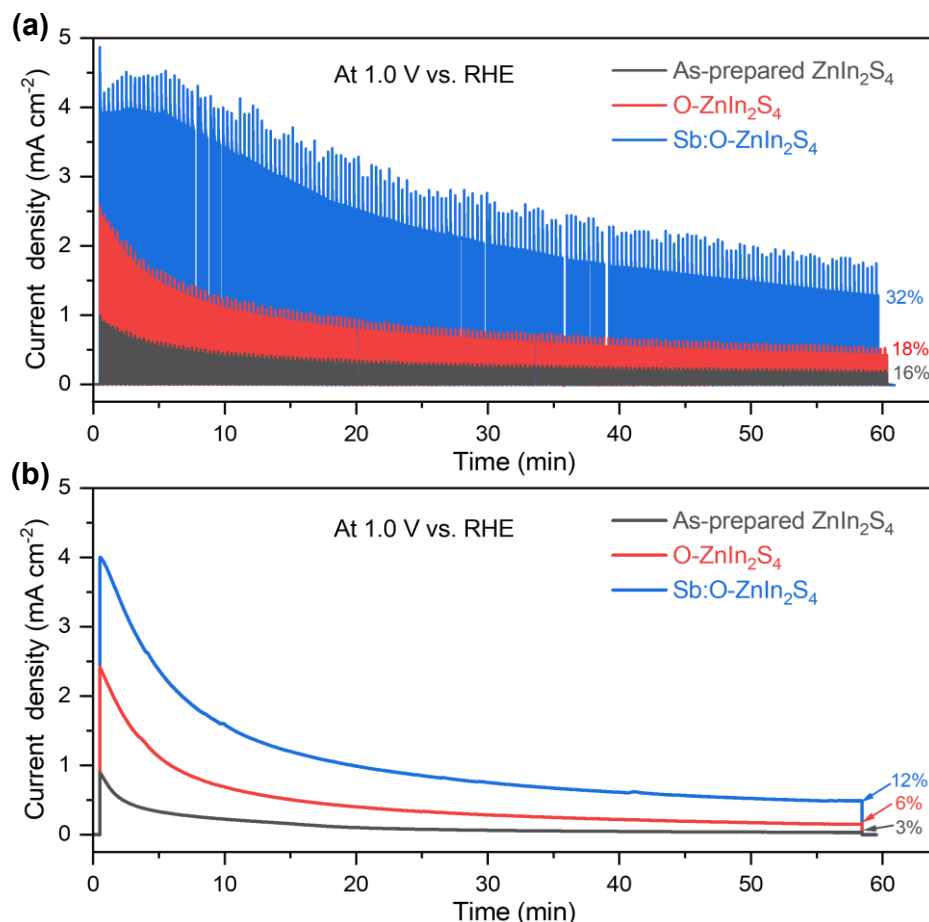

**Fig. S26.** Extended PEC stability tests of as-prepared ZnIn<sub>2</sub>S<sub>4</sub>, O-ZnIn<sub>2</sub>S<sub>4</sub>, and Sb:O-ZnIn<sub>2</sub>S<sub>4</sub> photoanodes measured in 0.5 M Na<sub>2</sub>SO<sub>4</sub> electrolyte at 1.0 V vs. RHE. *J-T* curves were recorded under chopped (a) and continuous (b) AM 1.5G illumination for 60 min. All photoanodes exhibit noticeable photocurrent decay on the time scale of tens of minutes. Under chopped illumination, the Sb:O-ZnIn<sub>2</sub>S<sub>4</sub> photoanode retains ~32% of its initial photocurrent after 60 min, compared with ~16% for as-prepared ZnIn<sub>2</sub>S<sub>4</sub> and ~18% for O-ZnIn<sub>2</sub>S<sub>4</sub>. Under continuous illumination, Sb:O-ZnIn<sub>2</sub>S<sub>4</sub> maintains ~12% of the initial photocurrent after 60 min, whereas as-prepared ZnIn<sub>2</sub>S<sub>4</sub> and O-ZnIn<sub>2</sub>S<sub>4</sub> retain only ~3% and ~6%, respectively. Overall, the Sb:O-ZnIn<sub>2</sub>S<sub>4</sub> photoanode shows a slower decay rate and higher photocurrent retention than control samples under both illumination modes, indicating an improved resistance to photocorrosion on the same time scale.

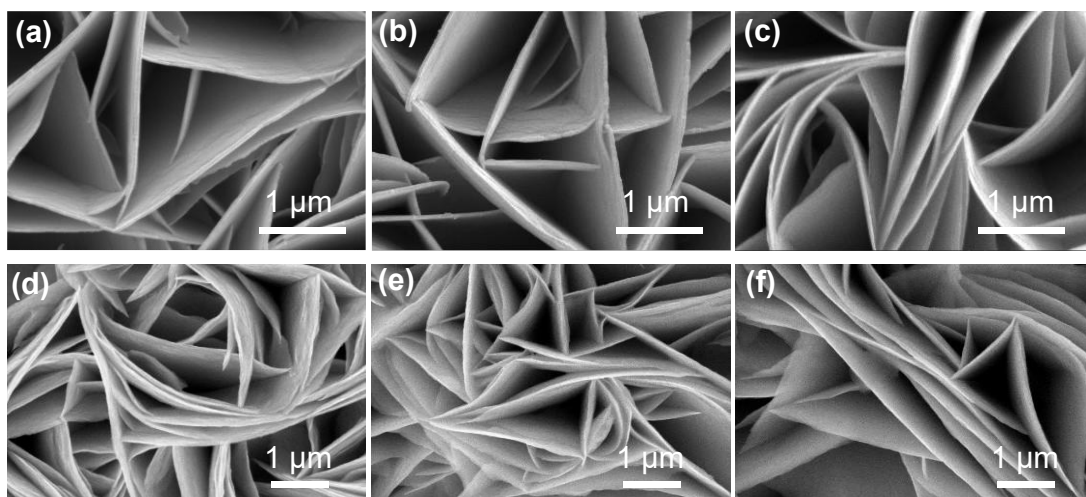

**Fig. S27.** Top-view SEM images for as-prepared ZnIn<sub>2</sub>S<sub>4</sub> (a, d), O-ZnIn<sub>2</sub>S<sub>4</sub> (b, e), and Sb:O-ZnIn<sub>2</sub>S<sub>4</sub> (c, f) samples before (a-c) and after (d-f) a 10 min PEC test.

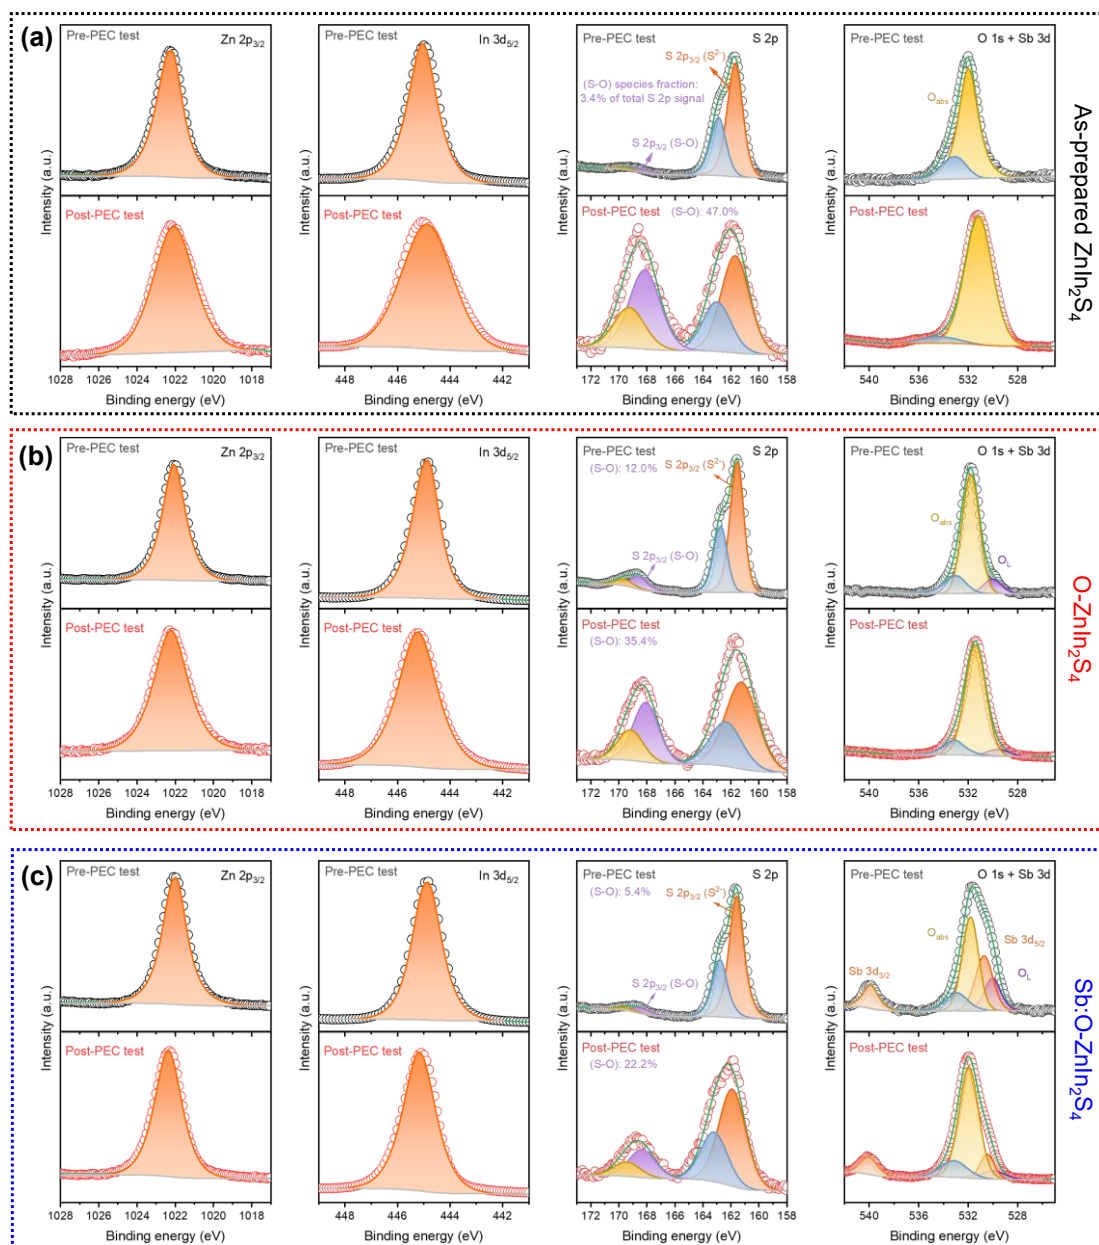

**Fig. S28.** HAXPES spectra of as-prepared  $\text{ZnIn}_2\text{S}_4$  (a),  $\text{O-ZnIn}_2\text{S}_4$  (b), and  $\text{Sb:O-ZnIn}_2\text{S}_4$  (c) photoanodes recorded before and after a 10 min PEC test. After PEC operation, the chemical states of Zn and In remain essentially unchanged, whereas partial oxidation of sulfur species is detected. The S 2p spectra reveal an increased contribution of S-O species for all samples, with the most pronounced increase for as-prepared  $\text{ZnIn}_2\text{S}_4$ , followed by  $\text{O-ZnIn}_2\text{S}_4$ . In contrast,  $\text{Sb:O-ZnIn}_2\text{S}_4$  exhibits a markedly lower degree of sulfur oxidation, indicating that Sb incorporation mitigates surface sulfur oxidation under anodic conditions. Notably, lattice-related O 1s components and Sb species remain detectable after PEC testing, suggesting that the Sb-induced O incorporation is not rapidly lost during short-term PEC operation.

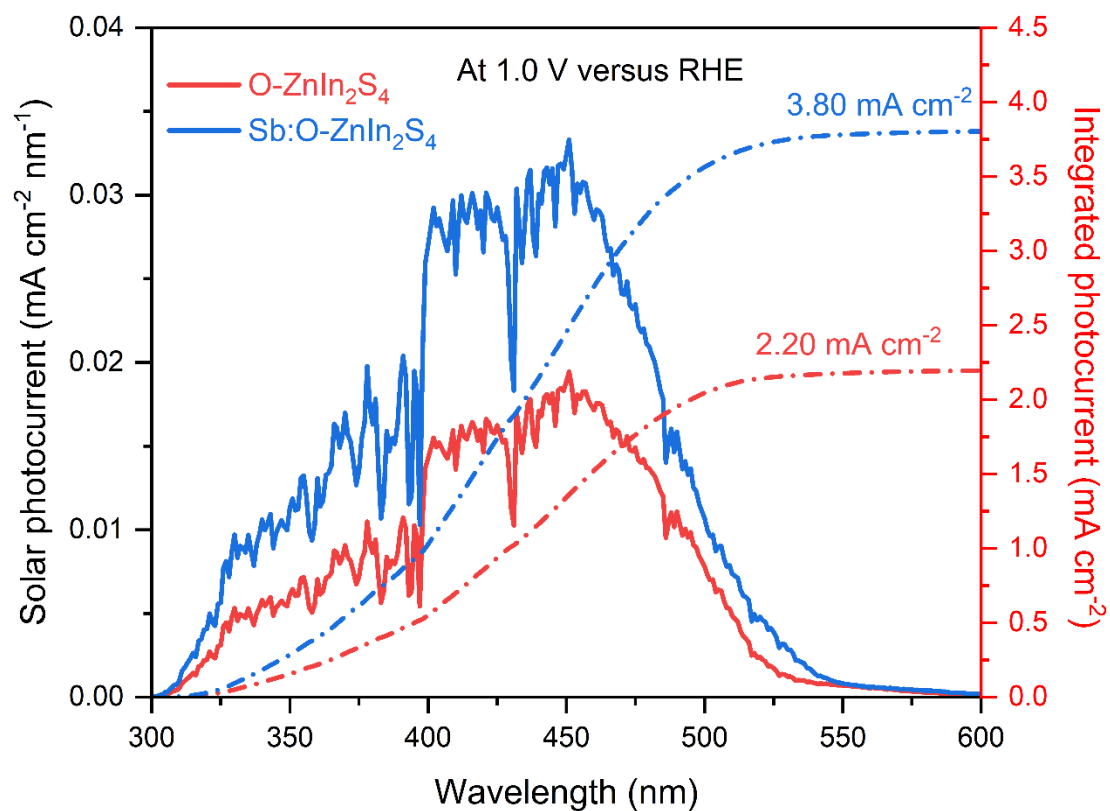

**Fig. S29.** Solar photocurrent spectra and integrated photocurrent curves for O-ZnIn<sub>2</sub>S<sub>4</sub> and Sb:O-ZnIn<sub>2</sub>S<sub>4</sub> photoanodes, calculated by multiplying the IPCE spectra (**Fig. 5d**) with the standard AM 1.5G spectrum (ASTM G173-03).

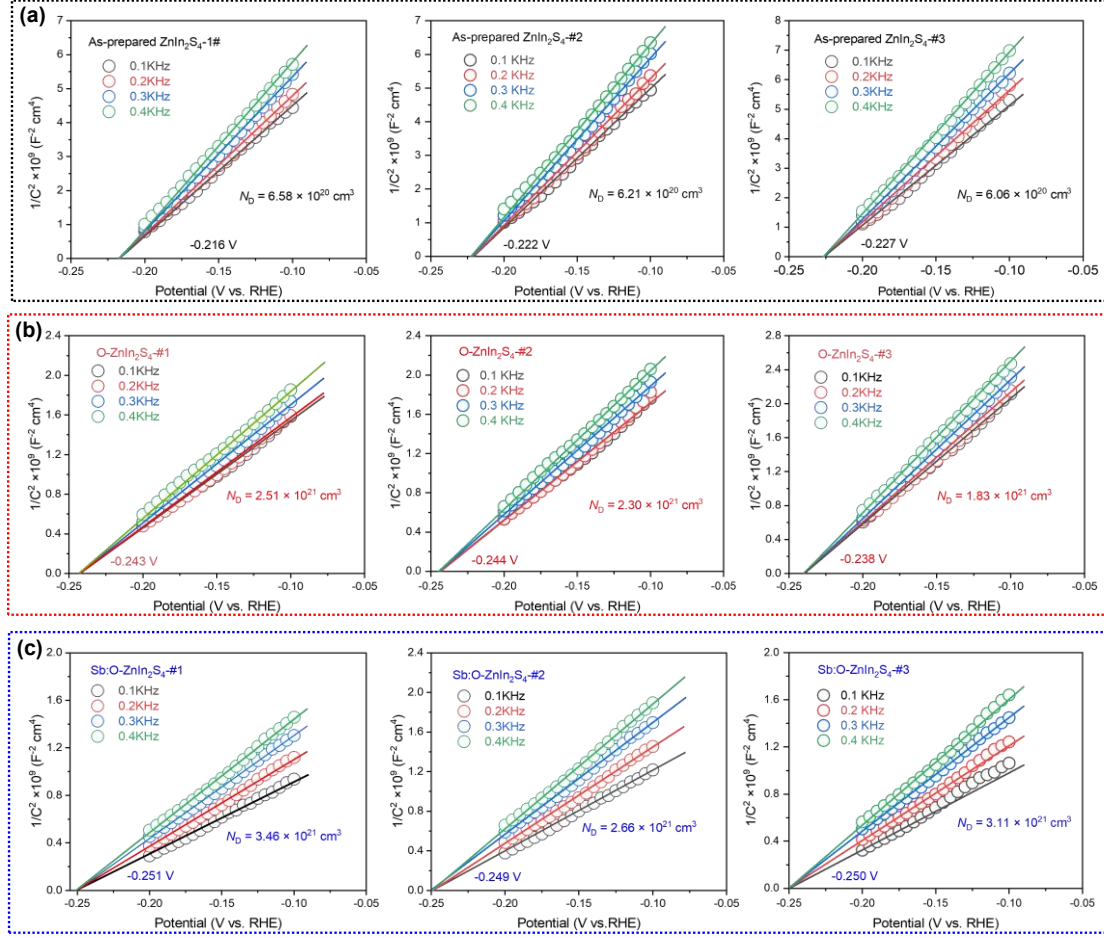

**Fig. S30.** Mott-Schottky plots of as-prepared  $\text{ZnIn}_2\text{S}_4$  (a), O- $\text{ZnIn}_2\text{S}_4$  (b), and Sb:O- $\text{ZnIn}_2\text{S}_4$  (c) photoanodes, measured for three independently prepared samples in 0.5 M  $\text{Na}_2\text{SO}_4$  electrolyte under dark conditions. The potential was scanned anodically at frequencies of 0.1, 0.2, 0.3, and 0.4 kHz with an AC amplitude of 15 mV. The lines show the fitting of the linear regions of the Mott-Schottky plots. From the interceptions of the lines with the x-axis, the flat-band potentials of the samples were obtained. The carrier concentration ( $N_D$ ) in the samples was estimated from the slope ( $k_s$ ) of the lines using  $N_D = 2/(e\epsilon_0\epsilon_r k_s)$ , where  $e$  is electron charge,  $\epsilon_0$  is vacuum permittivity, and  $\epsilon_r$  is the dielectric constant of  $\text{ZnIn}_2\text{S}_4$  ( $\sim 4.7$ ). At the frequency of 0.3 kHz, the  $N_D$  values for as-prepared  $\text{ZnIn}_2\text{S}_4$ , O- $\text{ZnIn}_2\text{S}_4$ , and Sb:O- $\text{ZnIn}_2\text{S}_4$  photoanodes were calculated to be  $(6.28 \pm 0.27) \times 10^{20} \text{ cm}^{-3}$ ,  $(2.21 \pm 0.35) \times 10^{21} \text{ cm}^{-3}$ , and  $(6.28 \pm 0.27) \times 10^{21} \text{ cm}^{-3}$ .

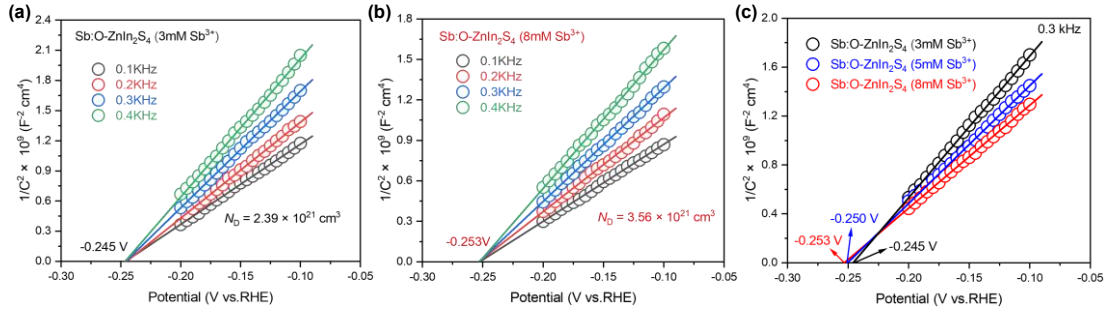

**Fig. S31.** Mott-Schottky plots of Sb:O-ZnIn<sub>2</sub>S<sub>4</sub> with varying Sb incorporation concentrations. With increasing Sb content, the flat-band potential gradually shifts cathodically and the  $N_D$  increases, which in theory should enhance PEC performance. However, the  $J$ - $V$  curves in **Fig. S22** show that the PEC performance improves initially but deteriorates at higher Sb concentrations, likely because excessive Sb incorporation introduces defect levels that act as recombination centers, thereby impairing PEC activity.



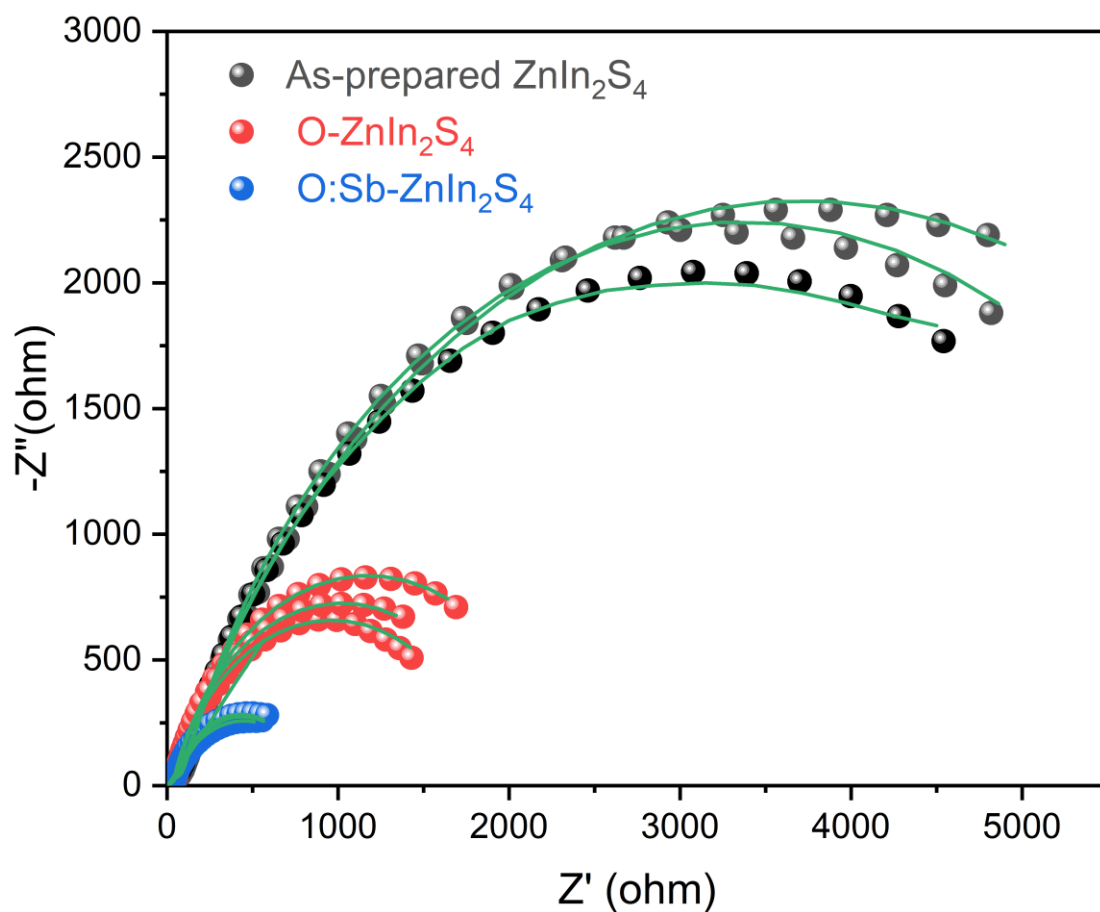

**Fig. S32.** PEIS for as-prepared  $\text{ZnIn}_2\text{S}_4$ ,  $\text{O-ZnIn}_2\text{S}_4$ , and  $\text{Sb:O-ZnIn}_2\text{S}_4$  photoanodes, measured for three independently prepared samples in 0.5M  $\text{Na}_2\text{SO}_4$  electrolyte under AM 1.5G simulated sunlight. Green lines represent the fitted the Nyquist plot of the PEIS data using a two-RC-unit equivalent circuit.

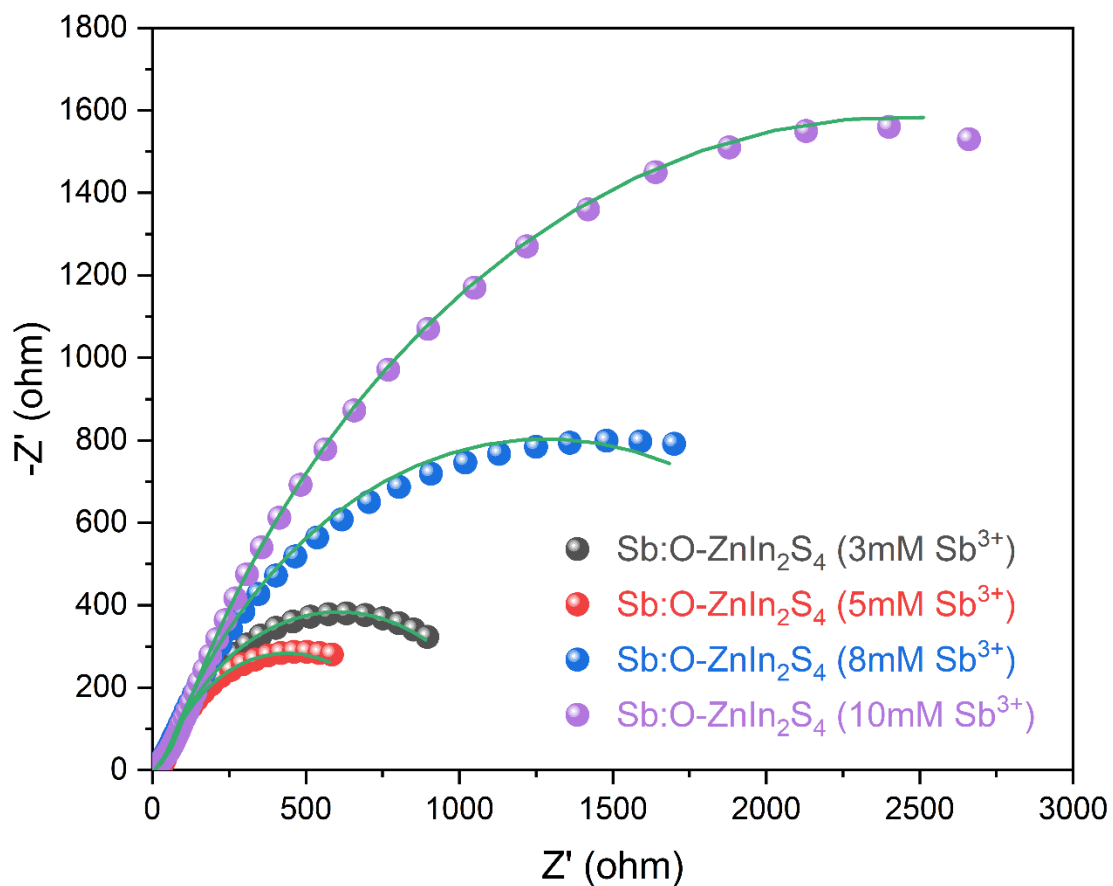

**Fig. S33.** PEIS for Sb:O-ZnIn<sub>2</sub>S<sub>4</sub> photoanodes with varying Sb incorporation concentrations measured in 0.5M Na<sub>2</sub>SO<sub>4</sub> electrolyte under AM 1.5G simulated sunlight. Green lines represent the fitted the Nyquist plot of the PEIS data using a two-RC-unit equivalent circuit.

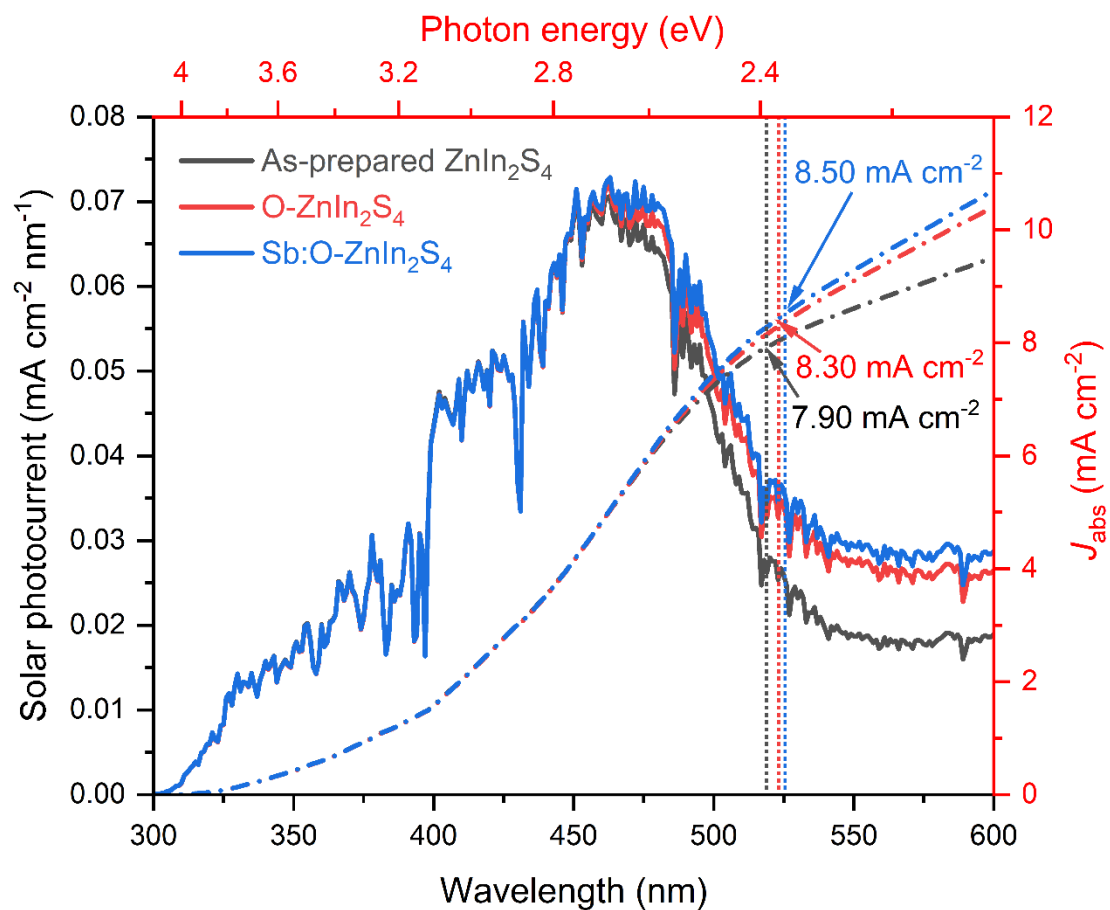

**Fig. S34.** Absorbed solar photocurrent spectra and absorption photocurrent ( $J_{\text{abs}}$ ) curves for O-ZnIn<sub>2</sub>S<sub>4</sub> and Sb:O-ZnIn<sub>2</sub>S<sub>4</sub> photoanodes obtained by integrating the absorption spectra shown in **Fig. 4a** (assuming 100% absorbed photon-to-current conversion efficiency) with the AM 1.5G reference spectrum (ASTM G173-03).

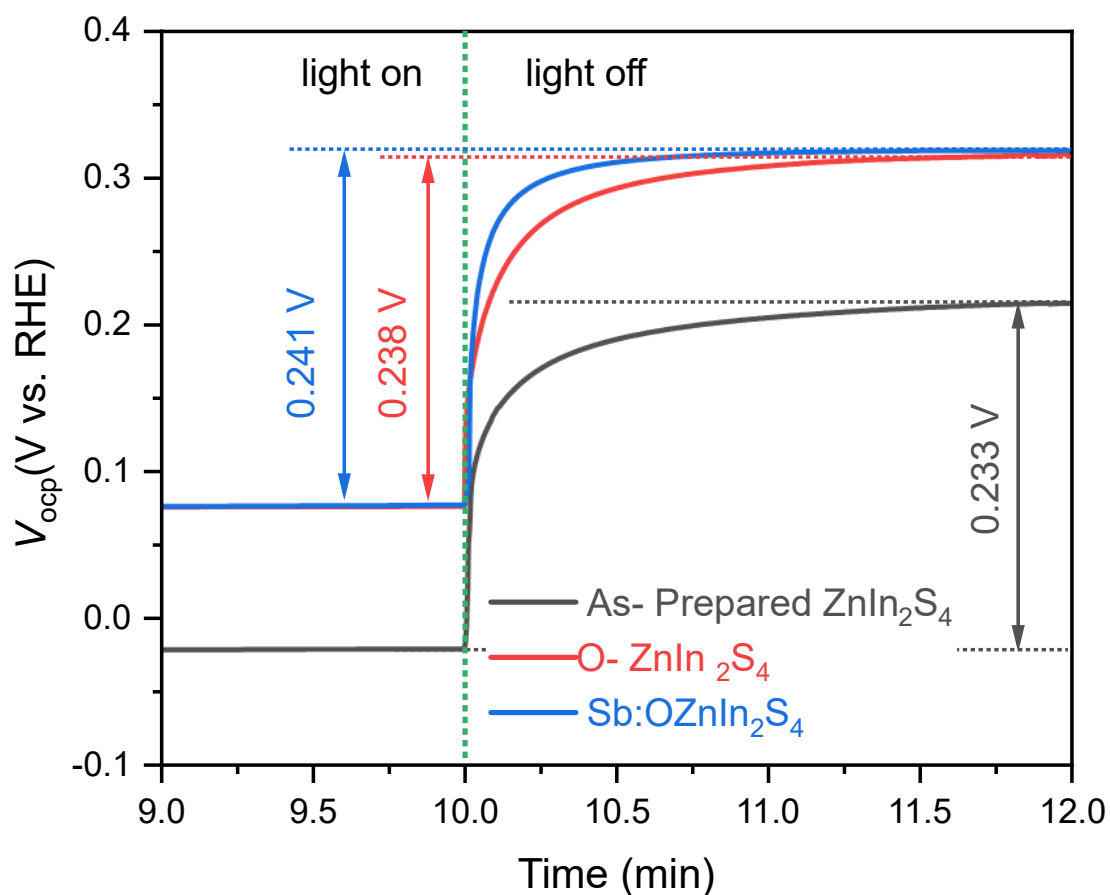

**Fig. S35.** Open circuit potential (OCP) decay profiles for as-prepared  $\text{ZnIn}_2\text{S}_4$ , O- $\text{ZnIn}_2\text{S}_4$ , and Sb:O- $\text{ZnIn}_2\text{S}_4$  photoanodes under illumination and in the dark. The measurements were conducted in 0.5M  $\text{Na}_2\text{SO}_4$  electrolyte. After recording the OCP for 10 minutes, the AM 1.5G simulated sunlight was turned off to create significant charge recombination. Carrier lifetimes derived from OCP-decay curves in **Fig. 5i**, were  $\sim 0.27$  s (as-prepared  $\text{ZnIn}_2\text{S}_4$ ),  $\sim 0.10$  s (O- $\text{ZnIn}_2\text{S}_4$ ), and  $\sim 0.086$  s (Sb:O- $\text{ZnIn}_2\text{S}_4$ ). The accelerated decay kinetics upon light-off indicate suppressed charge trapping in the Sb:O- $\text{ZnIn}_2\text{S}_4$ , thereby promoting charge separation and enhances PEC activity.

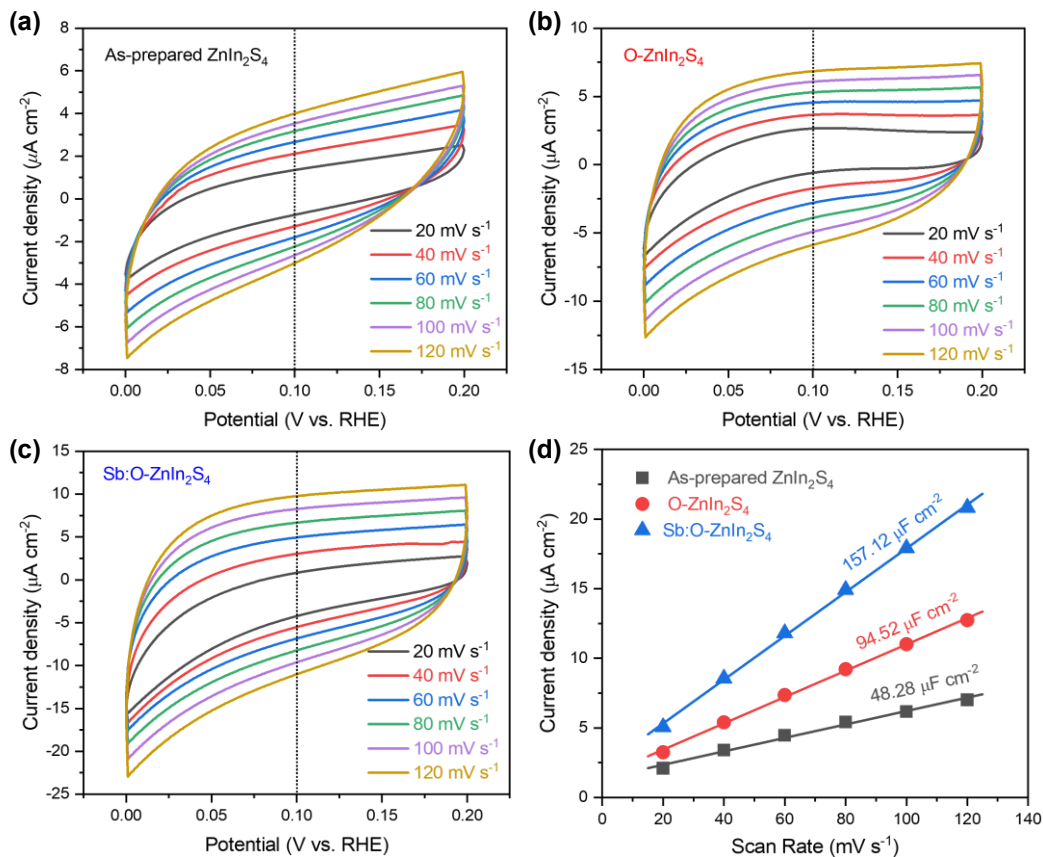

**Fig. S36.** (a-c) Cyclic voltammograms of as-prepared ZnIn<sub>2</sub>S<sub>4</sub> (a), O-ZnIn<sub>2</sub>S<sub>4</sub> (b), and Sb:O-ZnIn<sub>2</sub>S<sub>4</sub> (c) photoanodes recorded in 0.5 M Na<sub>2</sub>SO<sub>4</sub> solution at various scan rates. (d) Difference between the cathodic and anodic charging current densities at 0.10 V vs. RHE plotted as a function of scan rate for the three photoanodes. The slope of the linear fitting corresponds to twice the double-layer capacitance ( $C_{dl}$ ), which is used to estimate the electrochemically active surface area (ECSA). SEM analysis confirms that the nanosheet morphology is largely preserved after air annealing and subsequent Sb incorporation, indicating that the increased ECSA does not originate from geometric surface area enlargement but from chemical/electronic activation of surface states. O-related surface species introduced during air annealing enhance interfacial charge storage and provide additional adsorption/coordination sites for oxygenated intermediates, facilitating hole accumulation. Subsequent Sb incorporation further regulates these O-related surface species by suppressing sulfur oxidation and stabilizing electronically favorable surface states, as evidenced by increased  $C_{ss}$ , reduced  $R_{ct}$ , and enhanced  $\eta_{inj}$ . As a result, the enlarged ECSA of Sb:O-ZnIn<sub>2</sub>S<sub>4</sub> reflects both a higher density of accessible active sites and improved interfacial reaction kinetics.

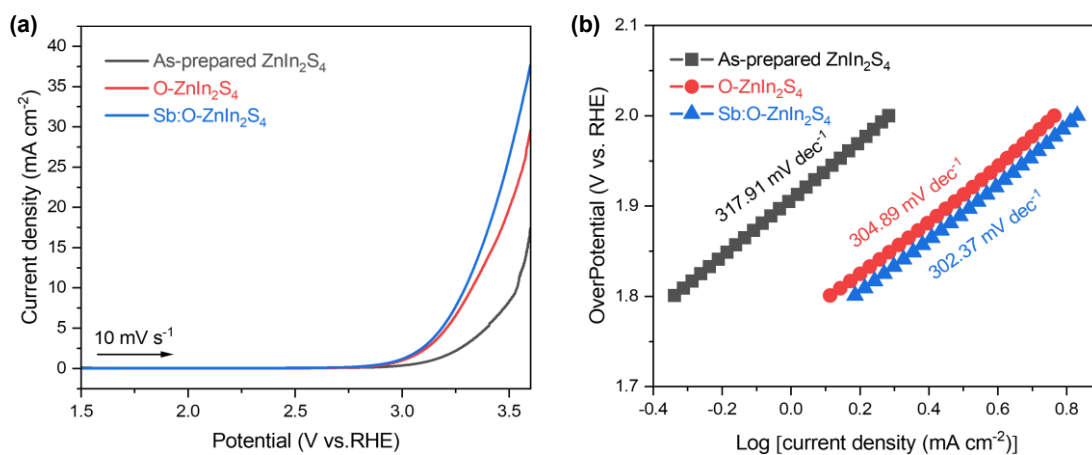

**Fig. S37.** (a) Dark  $J$ - $V$  curves of as-prepared ZnIn<sub>2</sub>S<sub>4</sub>, O-ZnIn<sub>2</sub>S<sub>4</sub>, and Sb:O-ZnIn<sub>2</sub>S<sub>4</sub> photoanodes measured in 0.5M Na<sub>2</sub>SO<sub>4</sub> with a scan rate of 10 mV s<sup>-1</sup>. (b) Corresponding Tafel plots. The progressively reduced Tafel slopes suggest improved interfacial charge-transfer kinetics after air annealing and subsequent Sb incorporation, consistent with the promoted O-related defect modulation and the enhanced PEC activity.

**Table S1.** Detailed HAXPES and XPS data analyzed using Thermo Fisher Scientific's Avantage software. The atomic ratios of elements in the samples were quantified based on the Zn 2p<sub>3/2</sub>, In 3d<sub>5/2</sub>, S 2p<sub>3/2</sub>, Sb 3d<sub>5/2</sub>, and the lattice O component of the O 1s peak. Sensitivity factors and background subtraction were automatically accounted for by the software during the quantification process.

| Sample                                       |       | Zn 2p <sub>3/2</sub> |            | In 3d <sub>5/2</sub> |            | S 2p <sub>3/2</sub> |            |          |            | O 1s             |               |                |            | Sb 3d <sub>5/2</sub> |            |
|----------------------------------------------|-------|----------------------|------------|----------------------|------------|---------------------|------------|----------|------------|------------------|---------------|----------------|------------|----------------------|------------|
|                                              |       | Position             | Atomic (%) | Position             | Atomic (%) | S <sup>2-</sup>     |            | S-O      |            | O <sub>abs</sub> |               | O <sub>L</sub> |            | Position             | Atomic (%) |
|                                              |       |                      |            |                      |            | Position            | Atomic (%) | Position | Atomic (%) | Position         | Atomic (%)    | Position       | Atomic (%) |                      |            |
| As-prepared ZnIn <sub>2</sub> S <sub>4</sub> |       | 1022.2               | 11.66      | 445.1                | 19.67      | 161.7               | 44.37      | 168.4    | 1.57       | 531.9<br>533.0   | 18.21<br>4.52 | /              | /          | /                    | /          |
| O-ZnIn <sub>2</sub> S <sub>4</sub>           |       | 1022.1               | 10.39      | 444.8                | 19.36      | 161.5               | 33.29      | 168.5    | 4.51       | 531.8<br>533.0   | 24.40<br>4.92 | 530.0          | 3.13       | /                    | /          |
| Sb:O-ZnIn <sub>2</sub> S <sub>4</sub>        |       | 1022.0               | 11.57      | 444.9                | 22.98      | 161.6               | 38.33      | 168.4    | 2.19       | 531.8<br>533.0   | 14.66<br>3.96 | 530.0          | 5.15       | 530.7                | 1.16       |
| Etching Time                                 | 0 s   | 1022.0               | 8.22       | 445.0                | 16.40      | 161.7               | 26.36      | 168.5    | 2.12       | 531.8<br>534.0   | 39.37<br>2.95 | 529.0          | 3.71       | 530.7                | 0.87       |
|                                              | 60 s  | 1022.1               | 14.38      | 444.9                | 28.30      | 161.7               | 47.78      | /        | /          | 533.3            | 2.75          | 529.9          | 5.46       | 530.7                | 1.33       |
|                                              | 180 s | 1022.1               | 14.33      | 444.9                | 28.13      | 161.7               | 47.71      | /        | /          | 533.4            | 3.96          | 529.9          | 4.95       | 530.7                | 0.92       |
|                                              | 360 s | 1022.1               | 15.13      | 444.8                | 29.78      | 161.7               | 50.67      | /        | /          | /                | /             | 529.9          | 3.67       | 530.7                | 0.75       |
|                                              | 480 s | 1022.1               | 15.14      | 444.8                | 30.12      | 161.7               | 51.00      | /        | /          | /                | /             | 529.9          | 3.22       | 530.7                | 0.52       |

**Table S2.** Quantitative elemental compositions of the samples obtained from HAXPES and XPS data analysis.

| Sample                                       |       | Atomic ratios |      |              |                 |                                                      |                                     |                               |            |
|----------------------------------------------|-------|---------------|------|--------------|-----------------|------------------------------------------------------|-------------------------------------|-------------------------------|------------|
|                                              |       | In/Zn         | S/Zn | [S+(S-O)]/Zn | (S-O)/[S+(S+O)] | O <sub>L</sub> /(O <sub>abs</sub> + O <sub>L</sub> ) | O <sub>L</sub> /[S+O <sub>L</sub> ] | [S+ (S-O)+O <sub>L</sub> ]/Zn | Sb/[Sb+In] |
| As-prepared ZnIn <sub>2</sub> S <sub>4</sub> |       | 1.69          | 3.80 | 3.94         | 0.034           | 0.00                                                 | /                                   | 3.94                          | /          |
| O- ZnIn <sub>2</sub> S <sub>4</sub>          |       | 1.86          | 3.20 | 3.64         | 0.12            | 0.096                                                | 0.086                               | 3.94                          | /          |
| Sb:O-ZnIn <sub>2</sub> S <sub>4</sub>        |       | 1.99          | 3.32 | 3.50         | 0.054           | 0.22                                                 | 0.12                                | 3.95                          | 0.048      |
| Etching<br>Time                              | 0 s   | 1.99          | 3.20 | 3.47         | 0.074           | 0.081                                                | 0.12                                | 3.92                          | 0.050      |
|                                              | 60 s  | 1.97          | 3.32 | 3.32         | 0               | 0.67                                                 | 0.10                                | 3.70                          | 0.045      |
|                                              | 180 s | 1.96          | 3.33 | 3.38         | 0               | 0.56                                                 | 0.094                               | 3.67                          | 0.032      |
|                                              | 360 s | 1.97          | 3.35 | 3.35         | 0               | 1                                                    | 0.068                               | 3.59                          | 0.025      |
|                                              | 480 s | 1.99          | 3.37 | 3.37         | 0               | 1                                                    | 0.059                               | 3.58                          | 0.017      |



**Table S3.** Fitted parameters for the TRPL decay of different Sb:O-ZnIn<sub>2</sub>S<sub>4</sub> samples.

The  $f_1, f_2$ , and  $f_3$  are the fractional intensities;  $\tau_1, \tau_2$ , and  $\tau_3$  are the lifetimes;  $\tau_{AV}$  is the intensity-weighted average lifetime, which is equal to  $f_1\tau_1 + f_2\tau_2 + f_3\tau_3$ ; and  $\chi^2$  is the reduced chi-square value.

| Sample                                                            | $\tau_1$ ( $\mu$ s) | $f_1$ | $\tau_2$ ( $\mu$ s) | $f_2$ | $\tau_3$ ( $\mu$ s) | $f_3$ | $\tau_{AV}$ ( $\mu$ s) | $\chi^2$ |
|-------------------------------------------------------------------|---------------------|-------|---------------------|-------|---------------------|-------|------------------------|----------|
| Sb:O-ZnIn <sub>2</sub> S <sub>4</sub><br>(3mM SbCl <sub>3</sub> ) | 0.18                | 6.9%  | 1.24                | 22.4% | 10.22               | 70.8% | 7.52                   | 1.313    |
| Sb:O-ZnIn <sub>2</sub> S <sub>4</sub><br>(5mM SbCl <sub>3</sub> ) | 0.14                | 4.1%  | 1.21                | 15.6% | 12.38               | 80.4% | 10.15                  | 1.823    |
| Sb:O-ZnIn <sub>2</sub> S <sub>4</sub><br>(8mM SbCl <sub>3</sub> ) | 0.16                | 8.8%  | 1.13                | 25.0% | 9.73                | 66.3% | 6.74                   | 1.351    |

**Table S4.** Direction-dependent effective masses of electrons and holes for as-prepared ZnIn<sub>2</sub>S<sub>4</sub>, O-ZnIn<sub>2</sub>S<sub>4</sub>, and Sb:O-ZnIn<sub>2</sub>S<sub>4</sub> calculated at the band edges of the Brillouin zone and reported in units of the free-electron mass ( $m_0$ ). The electron effective masses ( $m_e^*$ ) and hole effective masses ( $m_h^*$ ) were obtained by parabolic fitting of the CBM and the VBM dispersions shown in **Fig. 3g-i**, respectively, using  $m^* = \hbar^2[\partial^2 E(k)/\partial k^2]^{-1}$ , where  $\hbar$  is the reduced Planck constant,  $k$  is the wave vector, and  $E(k)$  are the energy of the electron at  $k$ .

| Sample                                          | Electron ( $m_e^*$ )   |                        | Hole ( $m_h^*$ )       |                        |                   |
|-------------------------------------------------|------------------------|------------------------|------------------------|------------------------|-------------------|
|                                                 | $\Gamma \rightarrow M$ | $\Gamma \rightarrow K$ | $\Gamma \rightarrow M$ | $\Gamma \rightarrow K$ | $M \rightarrow K$ |
| As-prepared<br>ZnIn <sub>2</sub> S <sub>4</sub> | 0.08                   | 0.06                   | 0.28                   | 0.29                   | /                 |
| O-ZnIn <sub>2</sub> S <sub>4</sub>              | 0.10                   | 0.07                   | 0.72                   | /                      | 2.18              |
| Sb:O-ZnIn <sub>2</sub> S <sub>4</sub>           | 0.23                   | 0.26                   | 0.14                   | 0.12                   | /                 |

**Table S5.** Total energies, corresponding formation energies ( $E_{\text{form}}$ ) and atomic ratios of the DFT-optimized structural models

| Sample                                | System                                | Atomic ratios                           | Model          | Total energy (eV)    | $E_{\text{form}}$ (eV) |
|---------------------------------------|---------------------------------------|-----------------------------------------|----------------|----------------------|------------------------|
| As-prepared $\text{ZnIn}_2\text{S}_4$ | O                                     | —                                       | —              | -4.938941195         | —                      |
|                                       | S                                     | —                                       | —              | -4.09156015125       | —                      |
|                                       | Monolayer $\text{ZnIn}_2\text{S}_4$   | —                                       | —              | -254.46214984        | —                      |
|                                       | Monolayer $\text{ZnIn}_2\text{S}_4$   | (In vacancy)/(In atom) = 0.1111         | —              | -242.09592033        | —                      |
| O- $\text{ZnIn}_2\text{S}_4$          | O- $\text{ZnIn}_{2-x}\text{S}_{4-y}$  | $\text{O}/(\text{S}+\text{O}) = 0.0278$ | <b>Model 1</b> | <b>-244.01293255</b> | <b>-1.06963117625</b>  |
|                                       |                                       |                                         | Model 2        | -243.68554889        | -0.74224751625         |
|                                       |                                       |                                         | Model 3        | -243.79843522        | -0.85513384625         |
|                                       | 2O- $\text{ZnIn}_{2-x}\text{S}_{4-y}$ | $\text{O}/(\text{S}+\text{O}) = 0.0556$ | Model 1        | -245.59202831        | -1.8013458925          |
|                                       |                                       |                                         | Model 2        | -245.70489018        | -1.9142077625          |
|                                       |                                       |                                         | Model 3        | -245.73717717        | -1.9464947525          |
|                                       |                                       |                                         | <b>Model 4</b> | <b>-245.83417888</b> | <b>-2.0434964625</b>   |

|                                |                                         |                                                                                                                                                  |                |                      |                       |
|--------------------------------|-----------------------------------------|--------------------------------------------------------------------------------------------------------------------------------------------------|----------------|----------------------|-----------------------|
|                                | $3\text{O-ZnIn}_{2-x}\text{S}_{4-y}$    | $\text{O}/(\text{S}+\text{O}) = 0.0833$                                                                                                          | Model 1        | -247.58591166        | -2.94784819875        |
|                                |                                         |                                                                                                                                                  | Model 2        | -247.55596800        | -2.91790453875        |
|                                |                                         |                                                                                                                                                  | Model 3        | -247.53594780        | -2.89788433875        |
|                                |                                         |                                                                                                                                                  | <b>Model 4</b> | <b>-247.67108386</b> | <b>-3.03302039875</b> |
| $\text{Sb:O-ZnIn}_2\text{S}_4$ | $\text{Sb-ZnIn}_{2-x}\text{S}_{4-y}$    | $\text{Sb}/(\text{Sb} + \text{In}) = 0.058$<br>$(\text{In vacancy})/(\text{In} + \text{Sb}) = 0.0556$                                            | —              | -249.26941755        | —                     |
|                                | $\text{Sb:O-ZnIn}_{2-x}\text{S}_{4-y}$  | $\text{Sb}/(\text{Sb} + \text{In}) = 0.058$<br>$(\text{In vacancy})/(\text{In} + \text{Sb}) = 0.0556$<br>$\text{O}/(\text{S}+\text{O}) = 0.0278$ | Model 1        | -251.14319366        | -1.02639506625        |
|                                |                                         |                                                                                                                                                  | Model 2        | -251.41535738        | -1.29855878625        |
|                                |                                         |                                                                                                                                                  | <b>Model 3</b> | <b>-251.58192351</b> | <b>-1.46512491625</b> |
|                                | $\text{Sb:2O-ZnIn}_{2-x}\text{S}_{4-y}$ | $\text{Sb}/(\text{Sb} + \text{In}) = 0.058$<br>$(\text{In vacancy})/(\text{In} + \text{Sb}) = 0.0556$<br>$\text{O}/(\text{S}+\text{O}) = 0.0556$ | Model 1        | -253.67024087        | -2.7060612325         |
|                                |                                         |                                                                                                                                                  | Model 2        | -253.36013253        | -2.3959528925         |
|                                |                                         |                                                                                                                                                  | <b>Model 3</b> | <b>-253.82141074</b> | <b>-2.8572311025</b>  |
|                                |                                         |                                                                                                                                                  | Model 4        | -253.48723374        | -2.5230541025         |

|  |                                             |                                                                                                                                                                                    |                |                      |                       |
|--|---------------------------------------------|------------------------------------------------------------------------------------------------------------------------------------------------------------------------------------|----------------|----------------------|-----------------------|
|  | Sb:3O- ZnIn <sub>2-x</sub> S <sub>4-y</sub> | $\begin{aligned} \text{Sb}/(\text{Sb} + \text{In}) &= 0.058 \\ (\text{In vacancy})/(\text{In} + \text{Sb}) &= 0.0556 \\ \text{O}/(\text{S} + \text{O}) &= 0.0833 \end{aligned}$    | <b>Model 1</b> | <b>-255.84976218</b> | <b>-4.03820149875</b> |
|  |                                             |                                                                                                                                                                                    | Model 2        | -255.49665738        | -3.68509669875        |
|  |                                             |                                                                                                                                                                                    | Model 3        | -255.66091664        | -3.84935595875        |
|  |                                             |                                                                                                                                                                                    | Model 4        | -255.57791935        | -3.76635866875        |
|  | Sb:4O- ZnIn <sub>2-x</sub> S <sub>4-y</sub> | $\begin{aligned} \text{Sb}/(\text{Sb} + \text{In}) &= 0.058 \\ V_{\text{In}}/(\text{In} + \text{Sb}) &= 0.0556 \\ \text{O}/(\text{S} + \text{O}) &= \mathbf{0.1111} \end{aligned}$ | Model 1        | -257.36352856        | -4.704586835          |
|  |                                             |                                                                                                                                                                                    | Model 2        | -257.62890228        | -4.969960555          |
|  |                                             |                                                                                                                                                                                    | <b>Model 3</b> | <b>-257.70546358</b> | <b>-5.046521855</b>   |
|  |                                             |                                                                                                                                                                                    | Model 4        | -257.65246262        | -4.993520895          |

**Table S6.** Bandgap and band positions of different ZnIn<sub>2</sub>S<sub>4</sub> samples determined by UPS spectra and UV-vis absorption spectra.

| Sample                                            | $E_{BG}$ (eV) | $E_F$ (eV) vs. $E_{vac}$ | $E_{VB}$ (eV) vs. $E_{vac}$ | $E_{CB}$ (eV) vs. $E_{vac}$ |
|---------------------------------------------------|---------------|--------------------------|-----------------------------|-----------------------------|
| As-prepared ZnIn <sub>2</sub> S <sub>4</sub>      | 2.39          | -4.04                    | -6.09                       | -3.70                       |
| O-ZnIn <sub>2</sub> S <sub>4</sub>                | 2.37          | -3.94                    | -6.06                       | -3.69                       |
| Sb:O-ZnIn <sub>2</sub> S <sub>4</sub>             | 2.36          | -3.72                    | -5.89                       | -3.53                       |
| Sb:O-ZnIn <sub>2</sub> S <sub>4</sub><br>(inside) | ~2.36         | -3.87                    | -6.04                       | -3.68                       |

**Table S7.** PEC water oxidation performances of recently reported ZnIn<sub>2</sub>S<sub>4</sub>-based photoanodes (2014-2025).

| Structure                                                                                                       | Synthesis method                                                                        | Photocurrent (mA cm <sup>-2</sup> at<br>1.23 V vs. RHE) | HC-STH       | Electrolyte                                                        | Ref. |
|-----------------------------------------------------------------------------------------------------------------|-----------------------------------------------------------------------------------------|---------------------------------------------------------|--------------|--------------------------------------------------------------------|------|
| ZnIn <sub>2</sub> S <sub>4</sub> (O <sub>v</sub> , SO <sub>4</sub> <sup>2-</sup> )                              | Hydrothermal + Na <sub>2</sub> S treatment                                              | 3.52                                                    | 1.7%         | NaH <sub>2</sub> PO <sub>4</sub> /Na <sub>2</sub> HPO <sub>4</sub> | 10   |
| ZnIn <sub>2</sub> S <sub>4</sub> /CdS/ZnO                                                                       | Hydrothermal + ALD                                                                      | 3.48                                                    | 1.42%        | Na <sub>2</sub> SO <sub>4</sub>                                    | 11   |
| ZnIn <sub>2</sub> S <sub>4</sub> /Cu <sub>2</sub> S/ NiFe-LDH                                                   | Hydrothermal + ion exchange                                                             | 1.56                                                    | 0.224%       | Na <sub>2</sub> SO <sub>4</sub>                                    | 12   |
| TiO <sub>2</sub> /Cu-ZnIn <sub>2</sub> S <sub>4</sub>                                                           | Secondary hydrothermal                                                                  | 2.87                                                    | 0.51%        | Na <sub>2</sub> S                                                  | 13   |
| Pt/ZnIn <sub>2</sub> S <sub>4</sub> /Co-Pi                                                                      | Hydrothermal + electrochemical deposition                                               | 0.91                                                    | 0.39%        | Na <sub>2</sub> SO <sub>3</sub> /Na <sub>2</sub> S                 | 14   |
| In <sub>2</sub> S <sub>3</sub> /ZnIn <sub>2</sub> S <sub>4</sub>                                                | Hydrothermal                                                                            | 1.22                                                    | 0.56%        | Na <sub>2</sub> SO <sub>4</sub>                                    | 15   |
| Mg:ZnIn <sub>2</sub> S <sub>4</sub> /Co:ZnIn <sub>2</sub> S <sub>4</sub>                                        | Hydrothermal                                                                            | 0.92                                                    | 0.129%       | Na <sub>2</sub> SO <sub>4</sub>                                    | 16   |
| MoS <sub>2</sub> /ZnIn <sub>2</sub> S <sub>4</sub> /NiFeOOH                                                     | Hydrothermal + photo-deposition                                                         | 0.74                                                    | 0.093%       | Na <sub>2</sub> SO <sub>4</sub>                                    | 17   |
| ZnIn <sub>2</sub> S <sub>4</sub> /Cu <sub>2</sub> O/NiFeOOH/Ag                                                  | Hydrothermal + electrochemical deposition<br>+ chemical deposition+ chemical water bath | 1.22                                                    | 0.21%        | Na <sub>2</sub> SO <sub>4</sub>                                    | 18   |
| ZnIn <sub>2</sub> S <sub>4</sub> homojunction                                                                   | Hydrothermal                                                                            | 0.53                                                    | 0.035%       | Na <sub>2</sub> S/Na <sub>2</sub> SO <sub>3</sub>                  | 19   |
| ZnIn <sub>2</sub> S <sub>4</sub> /Au/PB                                                                         | Hydrothermal + photo-deposition +<br>electrochemical deposition                         | 0.42                                                    | Not reported | Na <sub>2</sub> SO <sub>4</sub>                                    | 20   |
| Sb <sub>2</sub> S <sub>3</sub> /ZnIn <sub>2</sub> S <sub>4</sub> /Cu <sub>2</sub> S                             | Hydrothermal + immersion                                                                | 2.81                                                    | 0.744%       | Na <sub>2</sub> SO <sub>4</sub>                                    | 21   |
| Fe <sub>2</sub> O <sub>3</sub> /Ti <sub>2</sub> C <sub>3</sub> T <sub>x</sub> /ZnIn <sub>2</sub> S <sub>4</sub> | Hydrothermal + spin-coating                                                             | 2.62                                                    | 0.87%        | Na <sub>2</sub> SO <sub>4</sub>                                    | 22   |

|                                                                                                     |                                                  |                             |              |                                                    |                  |
|-----------------------------------------------------------------------------------------------------|--------------------------------------------------|-----------------------------|--------------|----------------------------------------------------|------------------|
| Au-ZnIn <sub>2</sub> S <sub>4</sub>                                                                 | Hydrothermal + electrochemical deposition        | 0.52                        | 0.26%        | Na <sub>2</sub> SO <sub>4</sub>                    | 23               |
| ZnIn <sub>2</sub> S <sub>4</sub> /SnS <sub>2</sub>                                                  | Hydrothermal + ALD                               | 4.57                        | 1.67%        | Na <sub>2</sub> SO <sub>4</sub>                    | 24               |
| Mg:O-ZnIn <sub>2</sub> S <sub>4</sub>                                                               | Hydrothermal + low-temperature water bath        | 4.91                        | 1.61%        | Na <sub>2</sub> SO <sub>4</sub>                    | 25               |
| ZnIn <sub>2</sub> S <sub>4</sub> /Fe-In-S                                                           | Hydrothermal + ALD                               | 5.35                        | 1.41%        | Na <sub>2</sub> SO <sub>4</sub>                    | 26               |
| ZnIn <sub>2</sub> S <sub>4</sub> -CoNiP                                                             | Hydrothermal                                     | 4.77                        | 0.82%        | Na <sub>2</sub> SO <sub>4</sub>                    | 27               |
| ZnIn <sub>2</sub> S <sub>4</sub> /P-ZnIn <sub>2</sub> S <sub>4</sub>                                | Hydrothermal + Ar annealing                      | 6.34                        | 0.65%        | Na <sub>2</sub> SO <sub>4</sub>                    | 28               |
| S <sub>v</sub> -ZIS/N-TiO <sub>2</sub>                                                              | Hydrothermal                                     | 4.77                        | 0.48%        | Na <sub>2</sub> SO <sub>4</sub>                    | 29               |
| ZnIn <sub>2</sub> S <sub>4</sub> /TiO <sub>2</sub>                                                  | spin coating + electrodeposition                 | 0.8 at 0.5 V vs. Ag/AgCl    | Not reported | Na <sub>2</sub> SO <sub>4</sub>                    | 30               |
| Ni-ZnIn <sub>2</sub> S <sub>4</sub>                                                                 | Hydrothermal                                     | 0.25 at 0.9 V vs. Ag/AgCl   | 0.014%       | Na <sub>2</sub> SO <sub>4</sub>                    | 31               |
| SiO <sub>2</sub> /ZnIn <sub>2</sub> S <sub>4</sub> / TiO <sub>2</sub>                               | Hydrothermal                                     | 0.786 at 0.1 V vs. Ag/AgCl  | 0.48%        | Na <sub>2</sub> S/ Na <sub>2</sub> SO <sub>3</sub> | 32               |
| Ni(OH) <sub>2</sub> /CdS/ZnIn <sub>2</sub> S <sub>4</sub> /TiO <sub>2</sub>                         | Hydrothermal + immersion                         | 1.8 at 0.1 V vs. Ag/AgCl    | 0.93%        | Na <sub>2</sub> S/ Na <sub>2</sub> SO <sub>3</sub> | 33               |
| ZnIn <sub>2</sub> S <sub>4</sub> /TiO <sub>2</sub>                                                  | Hydrothermal                                     | 1.2 at 1.5 V vs. RHE        | 0.96%        | Na <sub>2</sub> S/ Na <sub>2</sub> SO <sub>3</sub> | 34               |
| ZnO/RGO/ZnIn <sub>2</sub> S <sub>4</sub>                                                            | Hydrothermal                                     | 1.43 at 0.5 V vs. Ag/AgCl   | 0.46%        | Na <sub>2</sub> SO <sub>4</sub>                    | 35               |
| TiO <sub>2</sub> /Cd-doped ZnIn <sub>2</sub> S <sub>4</sub>                                         | two-stage anodization approach +<br>Hydrothermal | 606.2 $\mu\text{A cm}^{-2}$ | 0.38%        | Na <sub>2</sub> SO <sub>4</sub>                    | 36               |
| O:V <sub>Zn</sub> :V <sub>S</sub> -ZnIn <sub>2</sub> S <sub>4</sub> /Al <sub>2</sub> O <sub>3</sub> | Hydrothermal + ALD                               | 4.63                        | Not reported | Na <sub>2</sub> SO <sub>3</sub>                    | 37               |
| <b>Sb:O-ZnIn<sub>2</sub>S<sub>4</sub></b>                                                           | <b>Hydrothermal</b>                              | <b>4.30</b>                 | <b>2.00%</b> | <b>Na<sub>2</sub>SO<sub>4</sub></b>                | <b>This work</b> |

**Table S8.** Fitted values of CPE parameters (including magnitude parameter  $Y_0$  and exponent  $n$  representing the degree of deviation from ideal capacitive behavior), resistances ( $R_s$ ,  $R_{\text{trap}}$ , and  $R_{\text{ct}}$ ), and effective capacitance ( $C$ ) obtained from EIS measurements.

| Sample                                                                     | $R_s$<br>( $\Omega \text{ cm}^2$ ) | $\text{CPE}_{\text{bulk}}$                                 |                              |                                                | $R_{\text{trap}}$<br>( $\Omega \text{ cm}^2$ ) | $\text{CPE}_{\text{ss}}$                                   |                              |                                              | $R_{\text{ct}}$<br>( $\Omega \text{ cm}^2$ ) | $\frac{R_{\text{trap}}}{R_{\text{trap}} + R_{\text{ct}}}$ |
|----------------------------------------------------------------------------|------------------------------------|------------------------------------------------------------|------------------------------|------------------------------------------------|------------------------------------------------|------------------------------------------------------------|------------------------------|----------------------------------------------|----------------------------------------------|-----------------------------------------------------------|
|                                                                            |                                    | $Y_{0,1}$<br>( $\Omega^{-1} \text{ cm}^{-2} \text{ s}^n$ ) | $n_1$                        | $C_{\text{bulk}}$<br>( $\mu\text{F cm}^{-2}$ ) |                                                | $Y_{0,2}$<br>( $\Omega^{-1} \text{ cm}^{-2} \text{ s}^n$ ) | $n_2$                        | $C_{\text{ss}}$<br>( $\mu\text{F cm}^{-2}$ ) |                                              |                                                           |
| As-prepared<br>ZnIn <sub>2</sub> S <sub>4</sub>                            | 3.94<br>± 0.47                     | (1.64 ±<br>6.22)×10 <sup>-4</sup>                          | 0.67<br>± 0.01               | 4.41<br>± 1.76                                 | 56.74<br>± 25.71                               | (6.78 ± 1.87) ×10 <sup>-5</sup>                            | 0.80<br>± 0.03               | 27.62<br>± 11.21                             | 2133.15<br>± 639.84                          | 0.025<br>± 0.004                                          |
| O-ZnIn <sub>2</sub> S <sub>4</sub>                                         | 3.44<br>± 0.63                     | (8.53 ±<br>2.01)×10 <sup>-5</sup>                          | 0.72<br>± 0.03               | 4.42<br>± 0.96                                 | 18.53<br>± 9.55                                | (1.16 ± 1.47)×10 <sup>-4</sup>                             | 0.85<br>± 0.02               | 38.24<br>± 3.77                              | 626.03<br>± 113.14                           | 0.029<br>± 0.017                                          |
| <b>Sb:O-ZnIn<sub>2</sub>S<sub>4</sub></b><br><b>(5mM SbCl<sub>3</sub>)</b> | <b>2.67</b><br><b>± 0.46</b>       | <b>(4.20 ±</b><br><b>3.20)×10<sup>-5</sup></b>             | <b>0.76</b><br><b>± 0.07</b> | <b>5.78</b><br><b>± 0.69</b>                   | <b>9.32</b><br><b>± 2.25</b>                   | <b>(3.32 ± 1.15)×10<sup>-4</sup></b>                       | <b>0.74</b><br><b>± 0.07</b> | <b>58.22</b><br><b>± 3.29</b>                | <b>225.59</b><br><b>± 5.34</b>               | <b>0.040</b><br><b>± 0.007</b>                            |
| Sb:O-ZnIn <sub>2</sub> S <sub>4</sub><br>(3mM SbCl <sub>3</sub> )          | 2.77                               | 9.58×10 <sup>-5</sup>                                      | 0.74                         | 5.29                                           | 9.54                                           | 3.24×10 <sup>-4</sup>                                      | 0.75                         | 46.75                                        | 326.33                                       | 0.028                                                     |
| Sb:O-ZnIn <sub>2</sub> S <sub>4</sub><br>(8mM SbCl <sub>3</sub> )          | 3.39                               | 1.85×10 <sup>-4</sup>                                      | 0.68                         | 5.74                                           | 25.63                                          | 1.01×10 <sup>-4</sup>                                      | 0.78                         | 18.65                                        | 761.05                                       | 0.033                                                     |
| Sb:O-ZnIn <sub>2</sub> S <sub>4</sub><br>(10mM SbCl <sub>3</sub> )         | 3.42                               | 9.19×10 <sup>-5</sup>                                      | 0.71                         | 3.41                                           | 29.12                                          | 1.00×10 <sup>-4</sup>                                      | 0.77                         | 17.37                                        | 1469.71                                      | 0.019                                                     |



## Supplementary References

- 1 G. Kresse and J. Furthmuller, *Phys. Rev. B*, 1996, **54**, 11169.
- 2 G. Kresse and J. Furthmuller, *Comput. Mater. Sci.*, 1996, **6**, 15-50.
- 3 G. Kresse and D. Joubert, *Phys. Rev. B*, 1999, **59**, 1758.
- 4 K. B. John P. Perdew and M. Ernzerhof, *Phys. Rev. B*, 1996, **77**, 3865.
- 5 K. Lee, É. D. Murray, L. Kong, B. I. Lundqvist and D. C. Langreth, *Phys. Rev. B*, 2010, **82**, 081101.
- 6 Y. Xiao, J. Fu, Y. Pihosh, K. Karmakar, B. Zhang, K. Domen and Y. Li, *Chem. Soc. Rev.*, 2025, **54**, 1268-1317.
- 7 P. Wang, Z. Shen, Y. Xia, H. Wang, L. Zheng, W. Xi and S. Zhan, *Adv. Funct. Mater.*, 2018, **29**, 1807013.
- 8 A. Zaban, M. Greenshtein and J. Bisquert, *ChemPhysChem*, 2003, **4**, 859-864.
- 9 H. Wang, Y. Xia, H. Li, X. Wang, Y. Yu, X. Jiao and D. Chen, *Nat. Commun.*, 2020, **11**, 3078.
- 10 W. Xu, W. Gao, L. Meng, W. Tian and L. Li, *Adv. Energy Mater.*, 2021, **11**, 2101181.
- 11 W. Xu, W. Tian, L. Meng, F. Cao and L. Li, *Adv. Energy Mater.*, 2021, **11**, 2003500.
- 12 Z. Hao, R. Wang, L. Zhang, H. Sheng, Y. Li, B. Dong and L. Cao, *Chem. Eng. J.*, 2023, **468**, 143568.
- 13 G. Wang, X. Sun, C. Xia, H. Li, B. Dong and L. Cao, *Colloids Surf. A*, 2024, **689**, 133656.
- 14 M. Zhou, Z. Liu, Q. Song, X. Li, B. Chen and Z. Liu, *Appl. Catal. Environ.*, 2019, **244**, 188-196.

- 15 H. Geng, P. Ying, K. Li, Y. Zhao and X. Gu, *Appl. Surf. Sci.*, 2021, **563**, 150289.
- 16 H. Qian, Z. Liu, J. Ya, Y. Xin, J. Ma and X. Wu, *J. Alloys Compd.*, 2021, **867**, 159028.
- 17 H. Qian, Z. Liu, B. Zhang, J. Li and J. Ya, *ChemCatChem*, 2021, **13**, 1940-1950.
- 18 Z. Hu, R. Wang, C. Han and R. Chen, *J. Colloid Interface Sci.*, 2022, **628**, 946-954.
- 19 H. Qian, Z. Liu, Z. Guo, M. Ruan and J. Ma, *J. Alloys Compd.*, 2020, **830**, 154639.
- 20 L. Wang, M. Zheng, L. Lai, R. Wang, T. Qian, L. Zhang, W. Younas, G. Mao and Q. Liu, *Eur. J. Inorg. Chem.*, 2024, **27**, e202400007.
- 21 Z. Hao, R. Wang, L. Zhang, X. Liu, H. Li, X. Meng, C. Gu, C. Xia, B. Dong and L. Cao, *Surf. Interfaces*, 2024, **51**, 104667.
- 22 S. Zhang, P. Du, H. Xiao, Z. Wang, R. Zhang, W. Luo, J. An, Y. Gao and B. Lu, *Angew. Chem. Int. Ed.*, 2023, **136**, e202315763.
- 23 F. Ye, W. Liu, C. Han, Y. Zhao, P. Liu and H. Wang, *Cryst. Growth Des.*, 2024, **25**, 101-108.
- 24 S. Li, L. Meng, W. Tian and L. Li, *Adv. Energy Mater.*, 2022, **12**, 2200629.
- 25 Y. Huang, J. He, W. Xu, T. Liu, R. Chen, L. Meng and L. Li, *Adv. Energy Mater.*, 2024, **14**, 2304376.
- 26 L. Meng, J. He, X. Zhou, K. Deng, W. Xu, P. Kidkhunthod, R. Long, Y. Tang and L. Li, *Nat. Commun.*, 2021, **12**, 5247.
- 27 C. Wang, W. Chen, S. Sun, H. Zhang, H. Zhou and S. Li, *Adv. Funct. Mater.*, 2024, **34**, 2313706.
- 28 Y. Wu, S. Yao, G. Lv, Y. Wang, H. Zhang, P. Liao and Y. Wang, *J. Catal.*, 2021,

**401**, 262-270.

- 29 Z. Bao, Y. Jiang, Z. Zhang, J. Lv, W. Shen, J. Dai, J. Wang, J. Cai and Y. Wu, *J. Mater. Chem. A*, 2024, **12**, 15902-15913.
- 30 I. B. Assaker, M. Gannouni, J. B. Naceur, M. A. Almessiere, A. L. Al-Otaibi, T. Ghrib, S. Shen and R. Chtourou, *Appl. Surf. Sci.*, 2015, **351**, 927-934.
- 31 B. Fan, Z. Chen, Q. Liu, Z. Zhang and X. Fang, *Appl. Surf. Sci.*, 2016, **370**, 252-259.
- 32 M. A. Mahadik, P. S. Shinde, M. Cho and J. S. Jang, *Appl. Catal. Environ.*, 2016, **184**, 337-346.
- 33 M. A. Mahadik, P. S. Shinde, H. H. Lee, M. Cho and J. S. Jang, *Sol. Energy Mater. Sol. Cells*, 2017, **159**, 475-487.
- 34 Q. Liu, H. Lu, Z. Shi, F. Wu, J. Guo, K. Deng and L. Li, *ACS Appl. Mater. Interfaces*, 2014, **6**, 17200-17207.
- 35 Z. Bai, X. Yan, Z. Kang, Y. Hu, X. Zhang and Y. Zhang, *Nano Energy*, 2015, **14**, 392-400.
- 36 Z. Li, K. H. Ng, S. Xu, Y. Zhang, Y. Lei, J. Huang and Y. Lai, *Chemosphere*, 2022, **307**, 135758.
- 37 L. Meng, D. Rao, W. Tian, F. Cao, X. Yan and L. Li, *Angew. Chem. Int. Ed.*, 2018, **57**, 16882-16887.
